# Supplementary material for: Who Are the Gatekeepers? An Examination of Diversity in INFORMS Journal Editorial Boards
Source: Atypon-hosted journal article supplement (doi:10.1287/serv.2021.0274), 2021-07-09
Supplement: serv.2021.0274.sm1.pdf [file serv.2021.0274.sm1.pdf]

**Who Are the Gatekeepers? An Examination of Diversity in INFORMS  
Journal Editorial Boards**

Laker J. Newhouse, Margaret L. Brandeau

**APPENDIX**

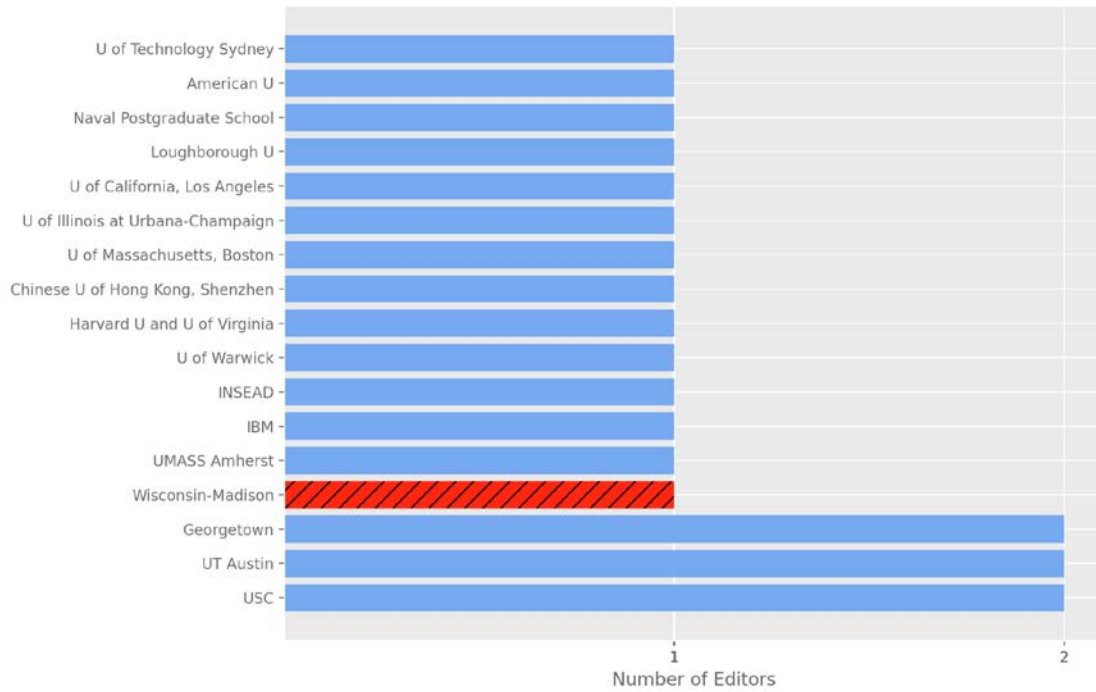

**Figure S1a. Decision Analysis**

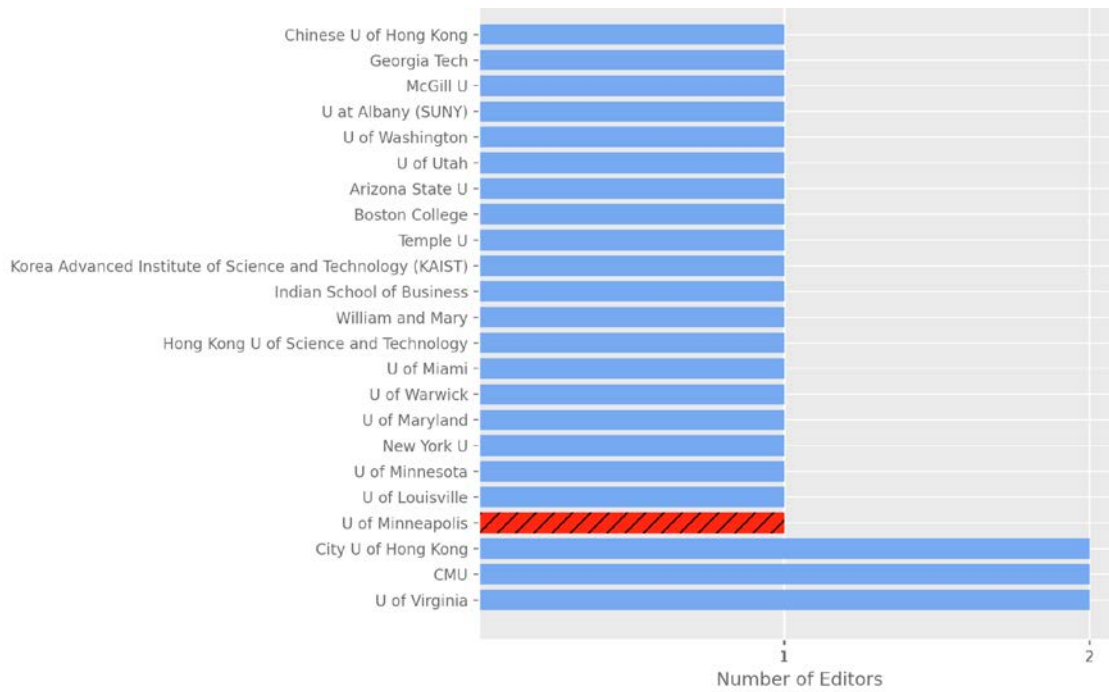

**Figure S1b. Information Systems Research**

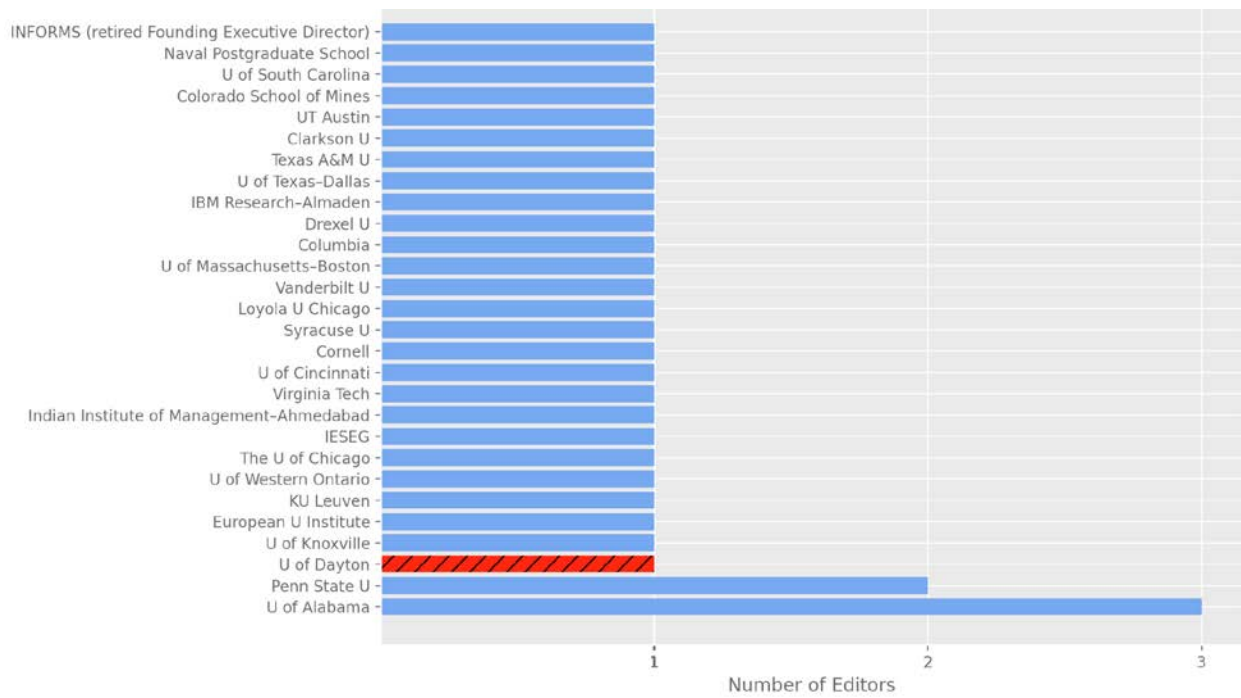

**Figure S1c. *INFORMS Journal on Applied Analytics***

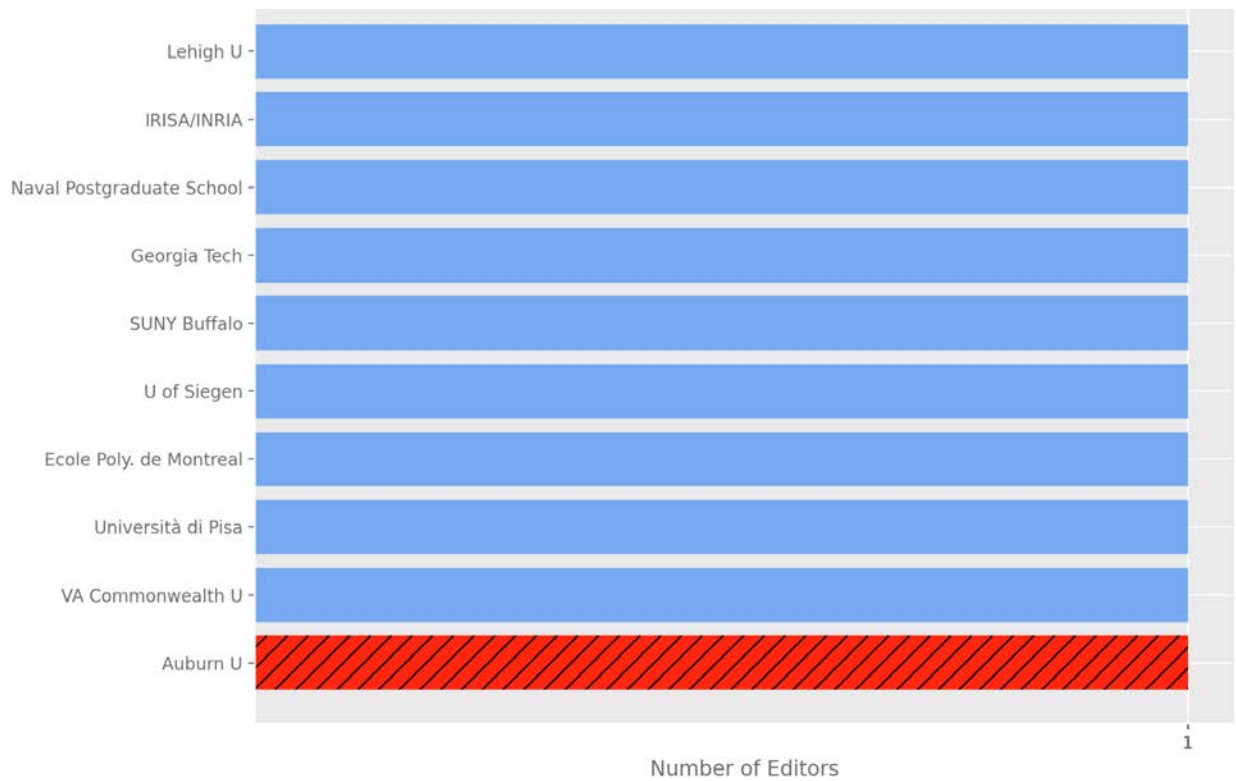

**Figure S1d. *INFORMS Journal on Computing***

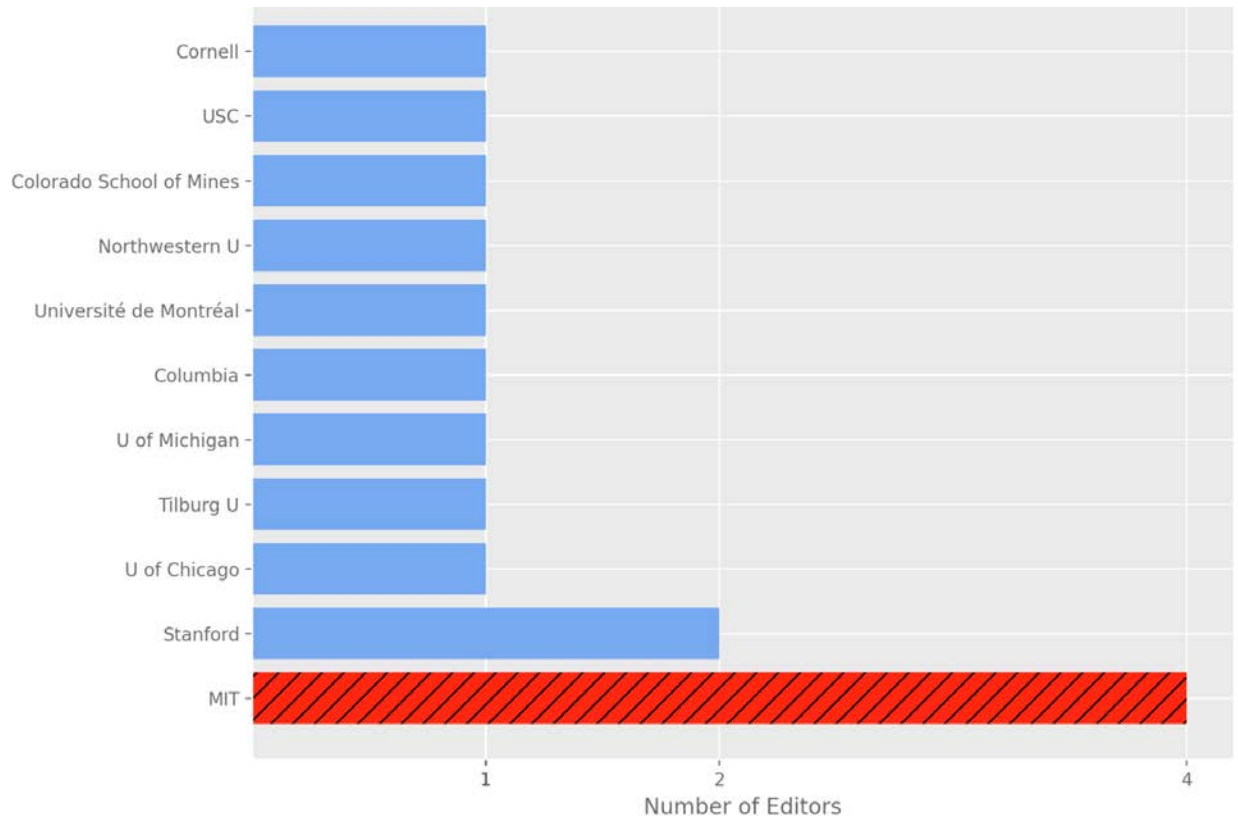

**Figure S1e. *INFORMS Journal on Optimization***

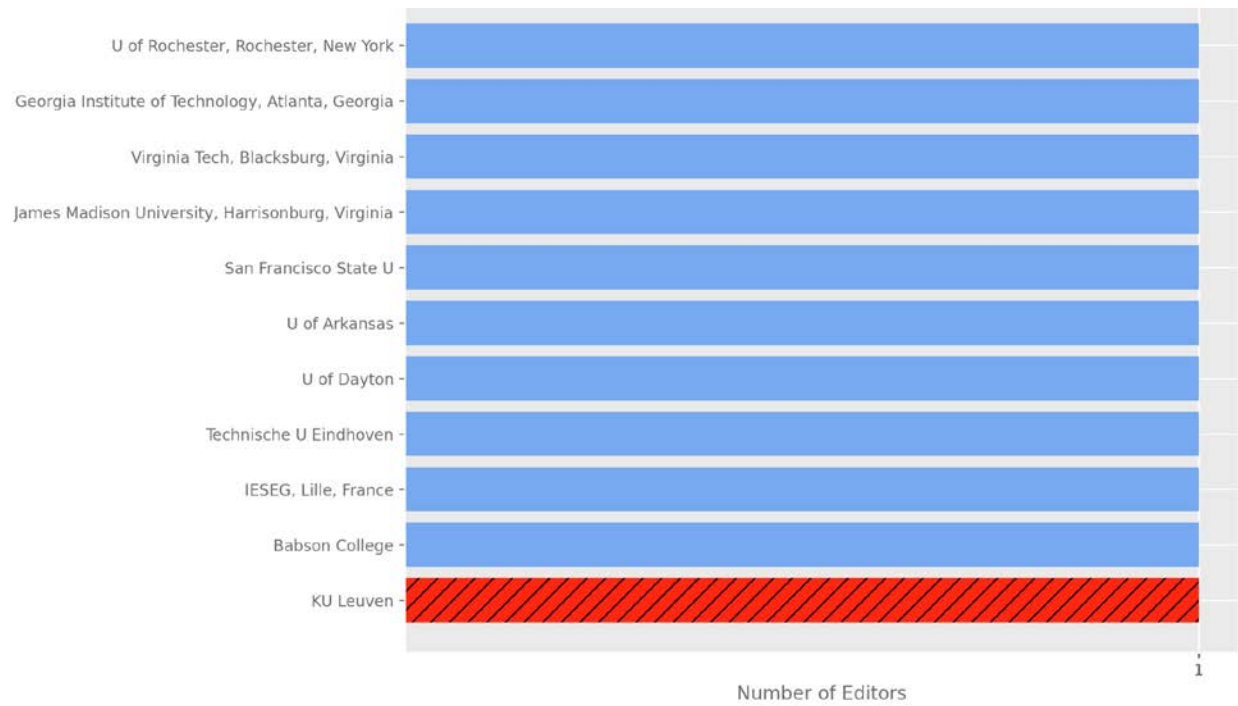

**Figure S1f. *INFORMS Transactions on Education***

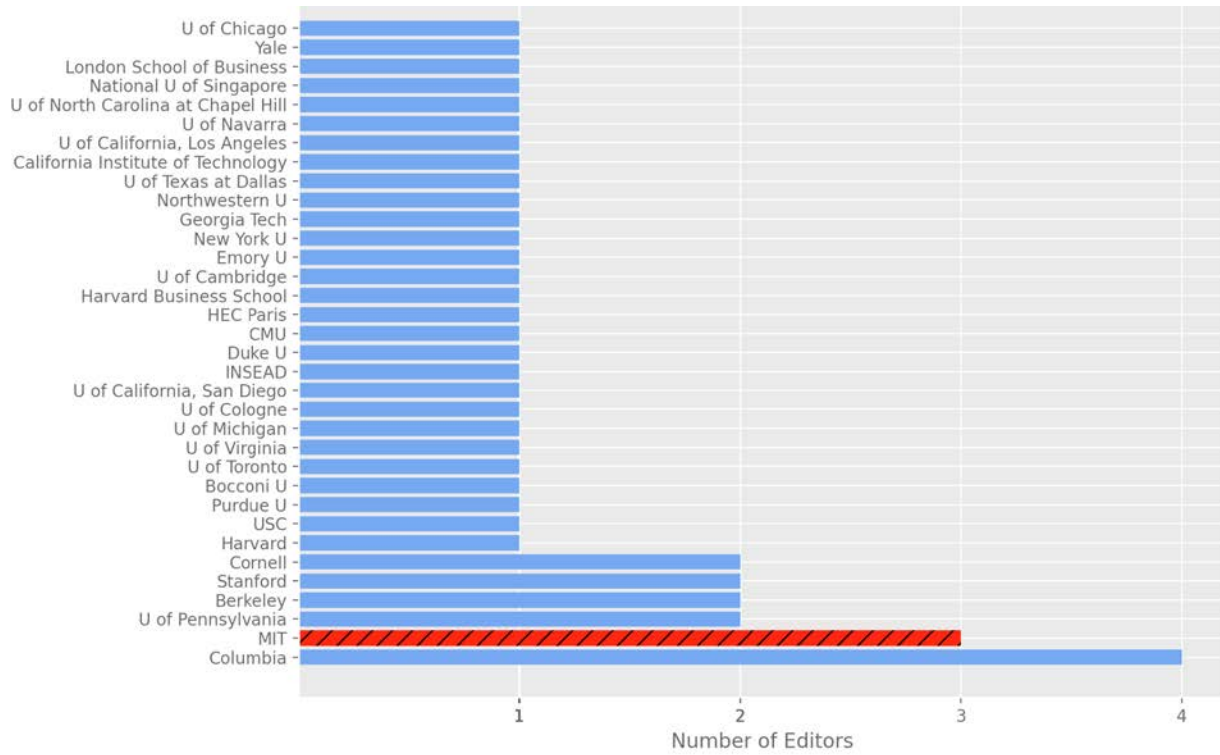

**Figure S1g. Management Science**

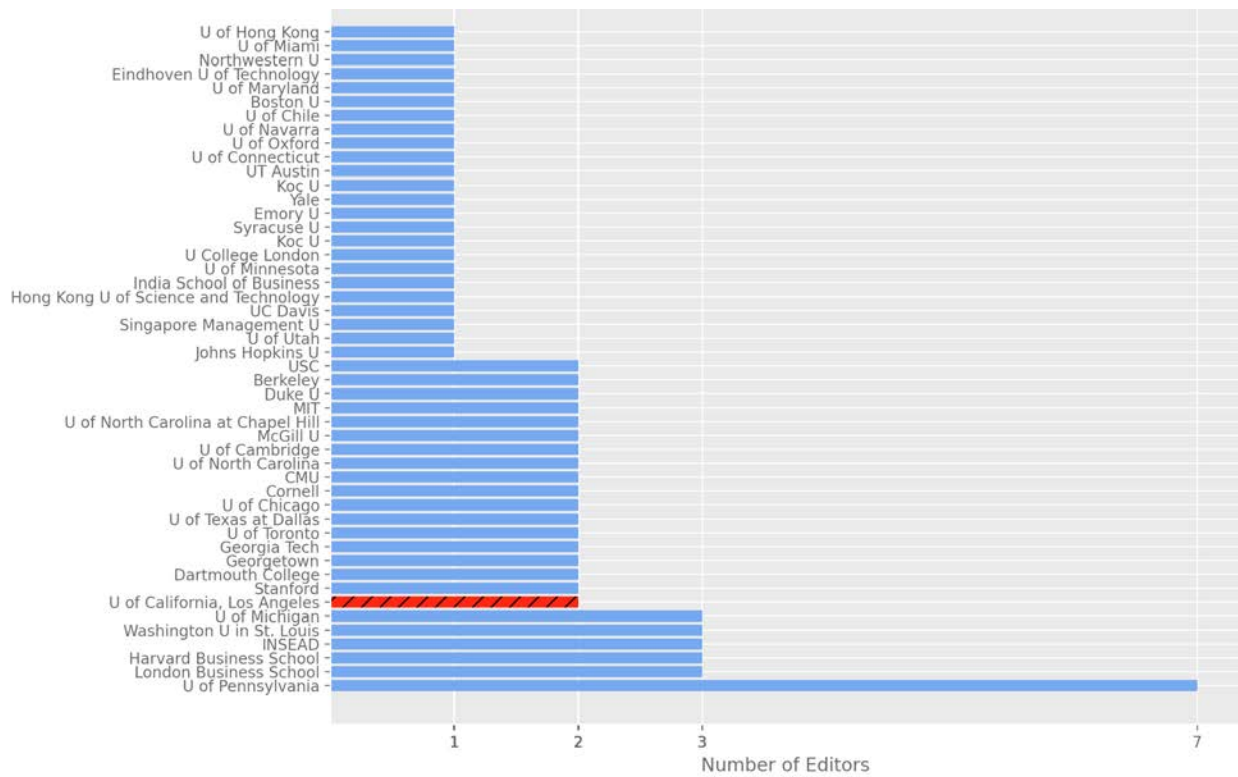

**Figure S1h. Manufacturing and Service Operations Management**

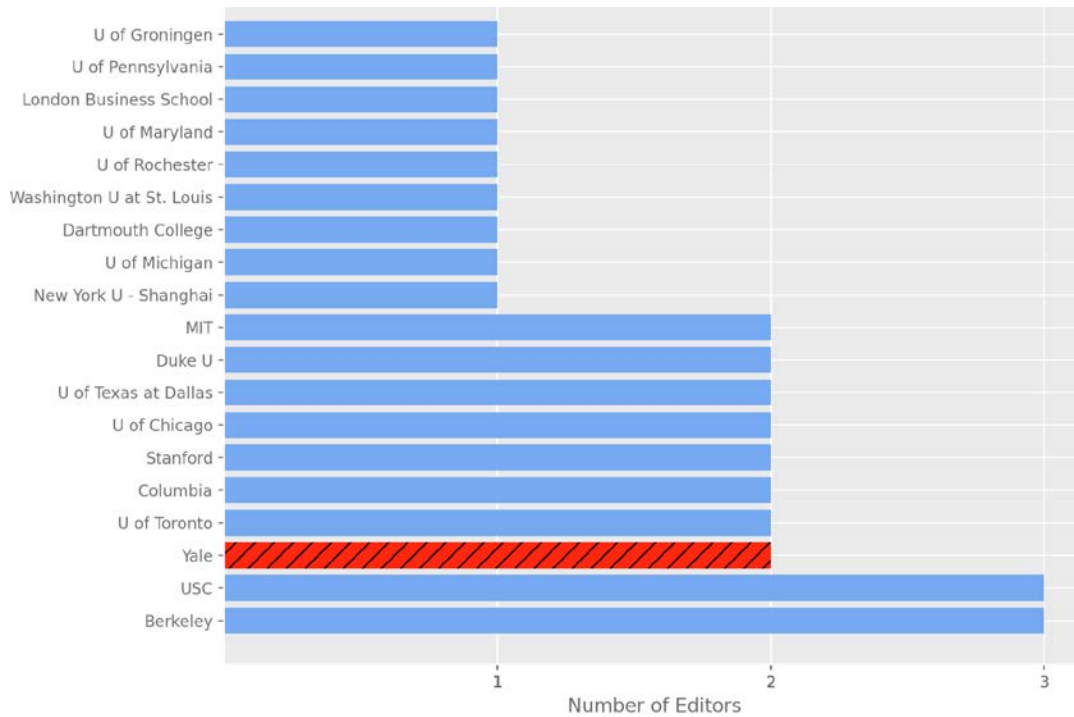

**Figure S1i. Marketing Science**

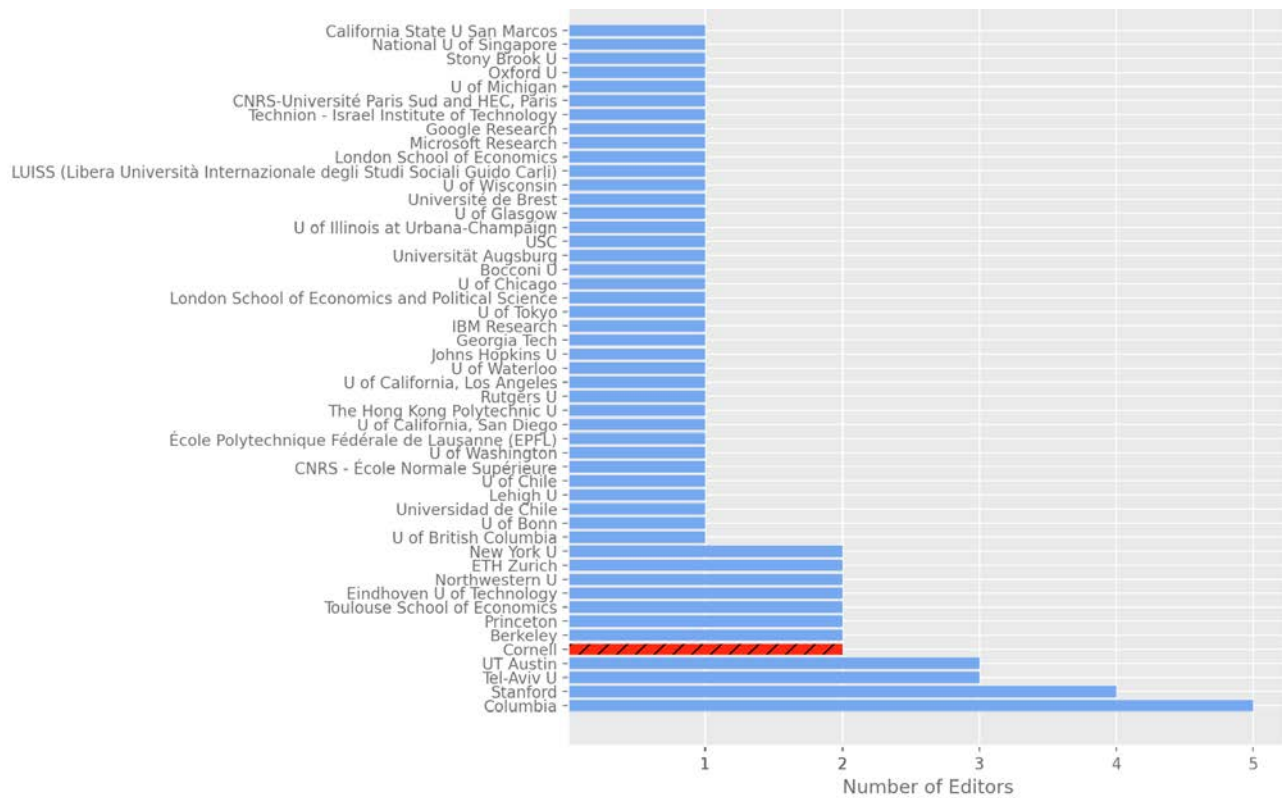

**Figure S1j. Mathematics of Operations Research**

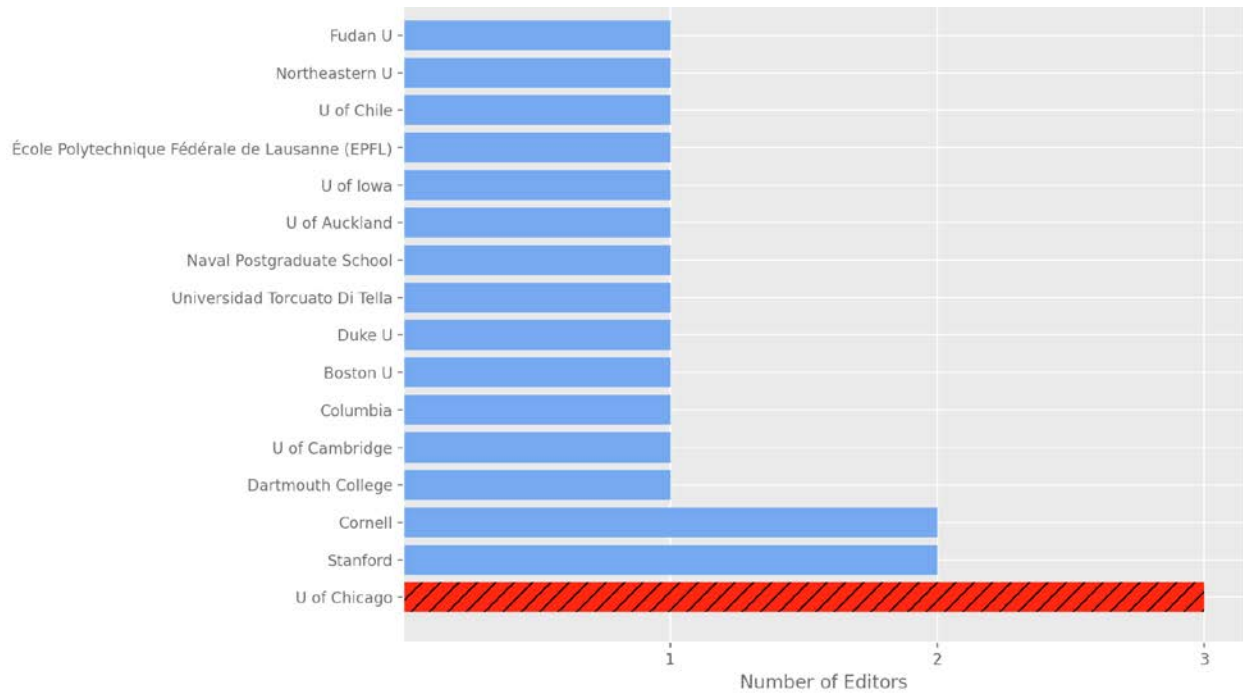

**Figure S1k. Operations Research**

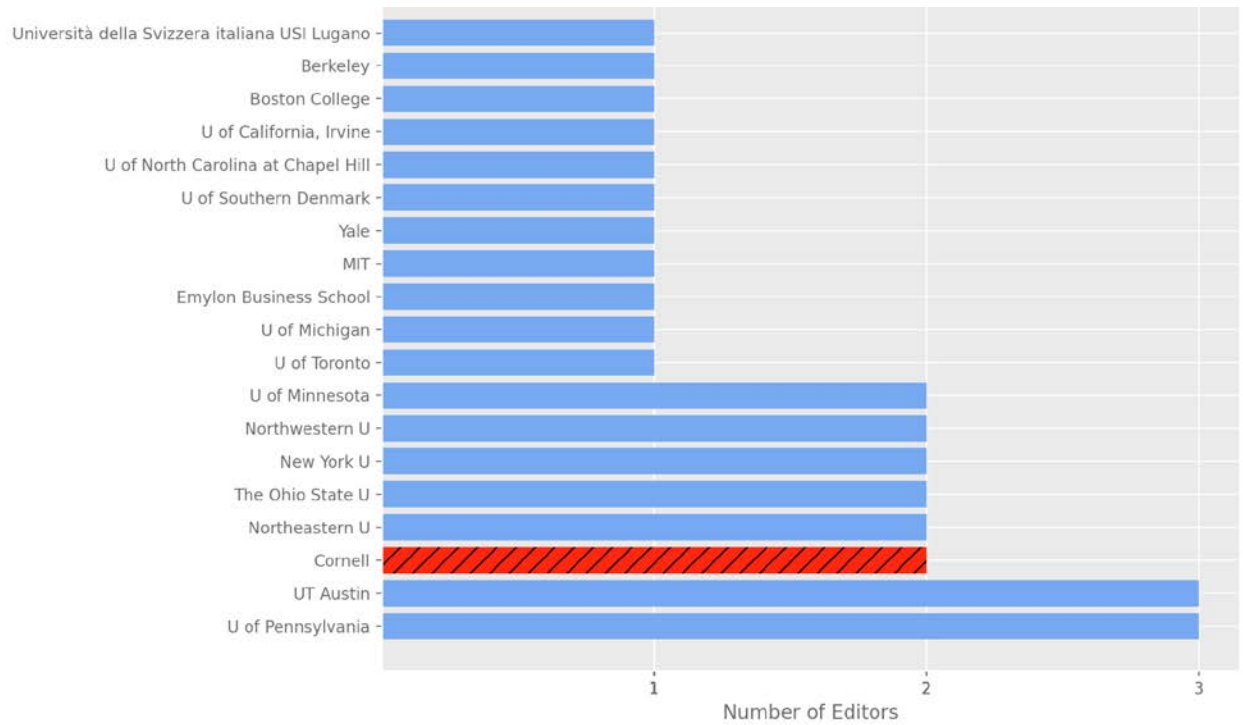

**Figure S1l. Organization Science**

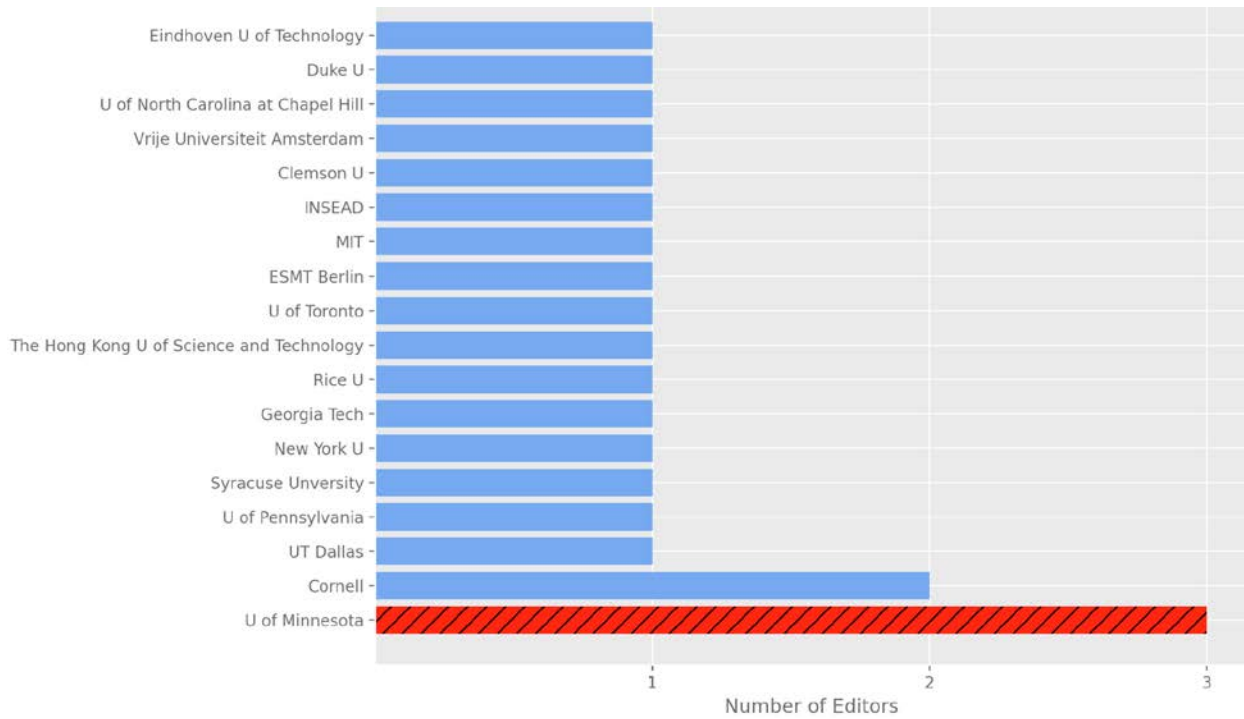

**Figure S1m. Service Science**

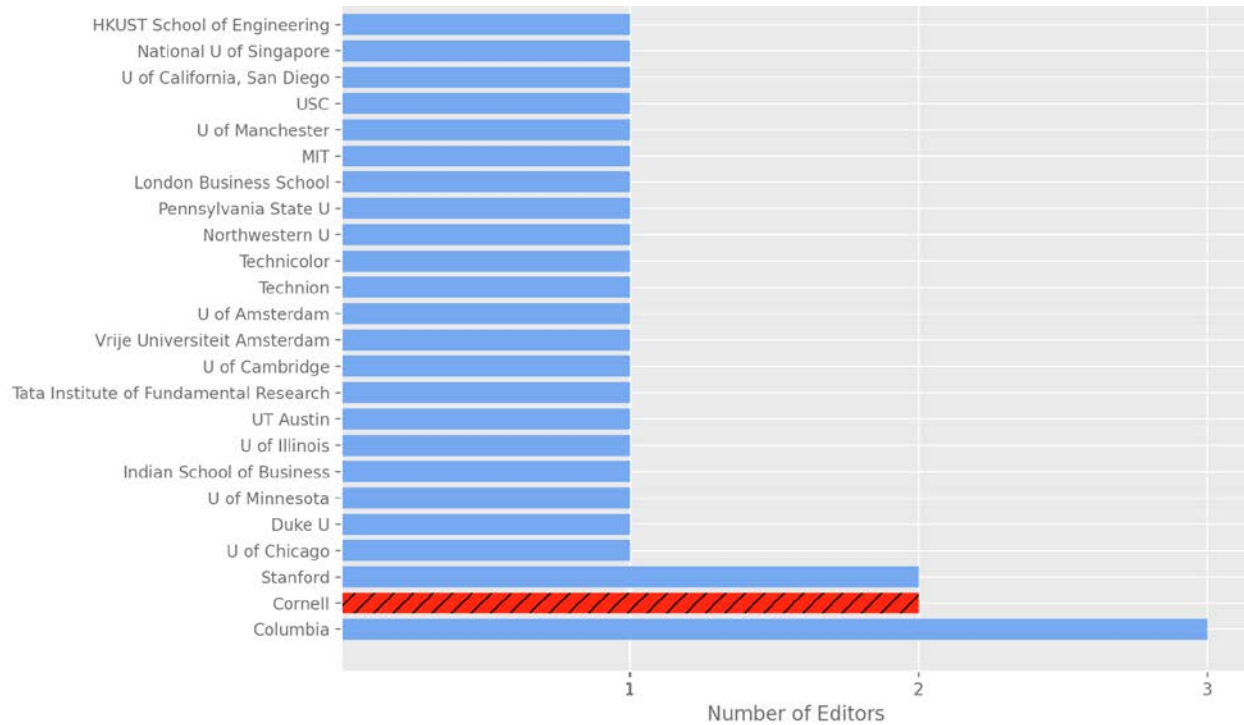

**Figure S1n. Stochastic Systems**

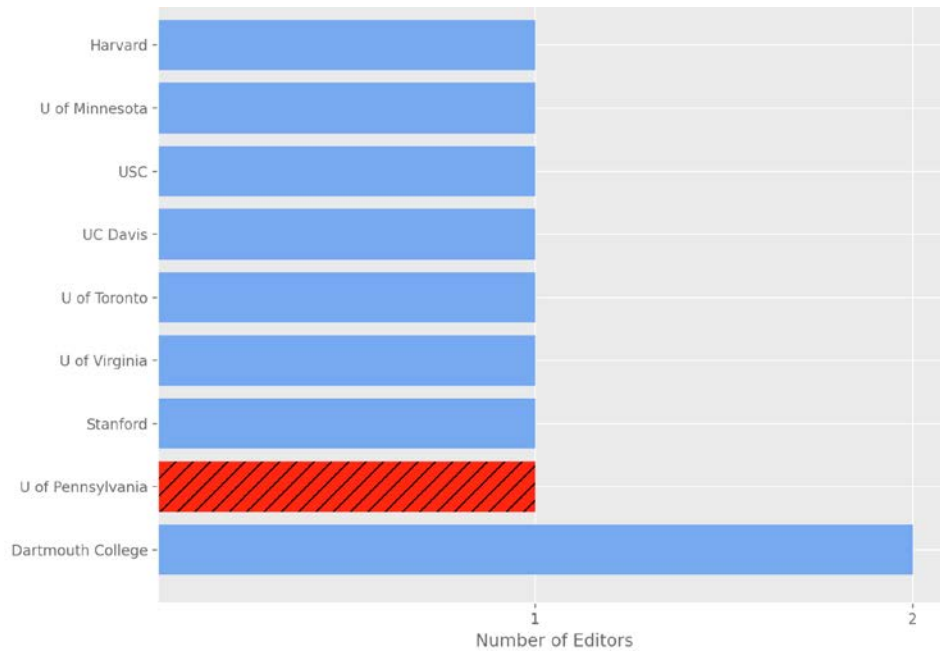

**Figure S1o. Strategy Science**

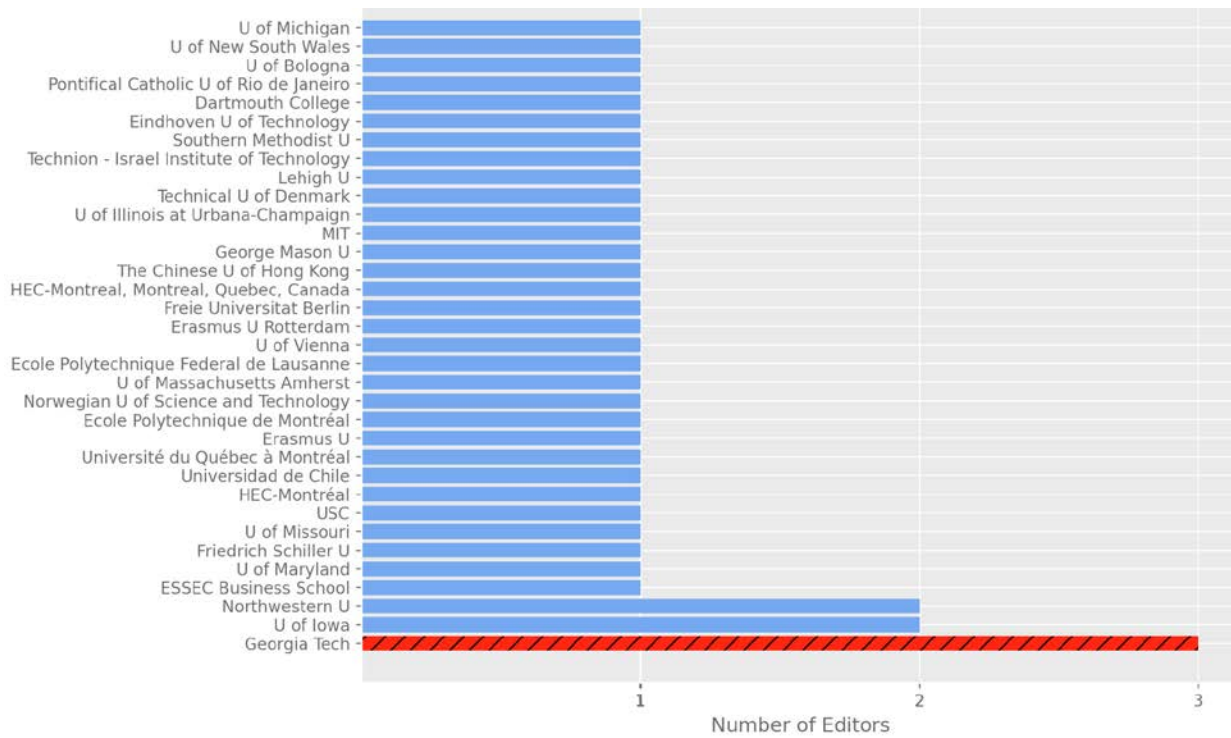

**Figure S1p. Transportation Science**

**Figure S1. Complete histogram of home institutions of editorial board members for each journal, with the editor-in-chief's home institution highlighted in red**

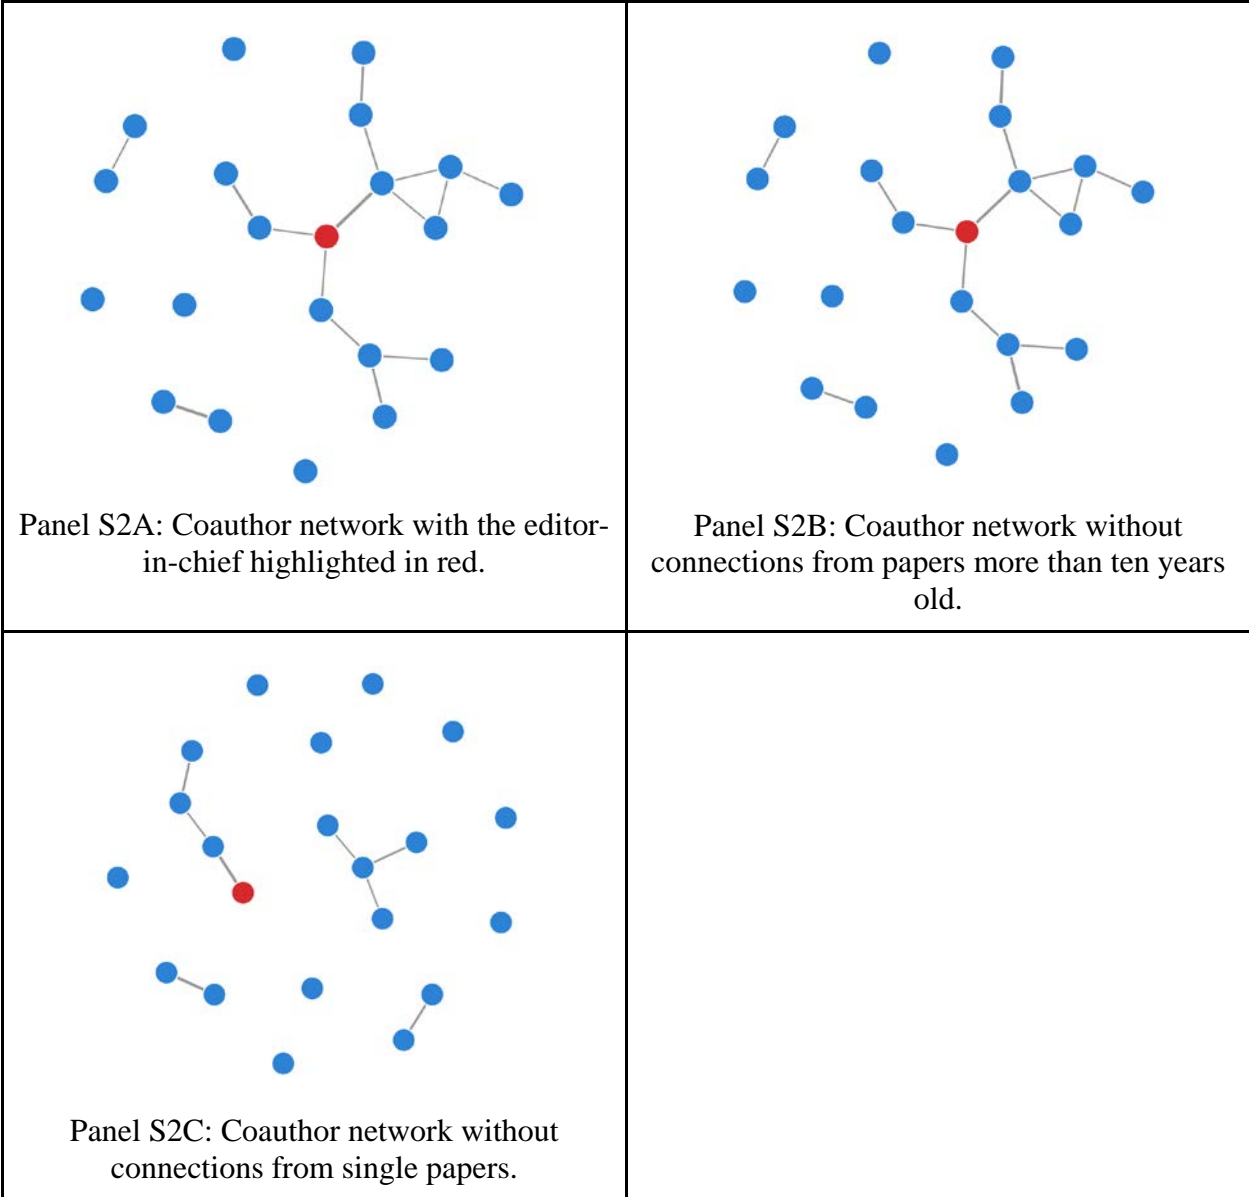

**Figure S2. Network graphics for *Decision Analysis*, showing all coauthor relationships (panel A), coauthor relationships within the last ten years (panel B), and coauthor relationships excluding connections from single papers (panel C).**

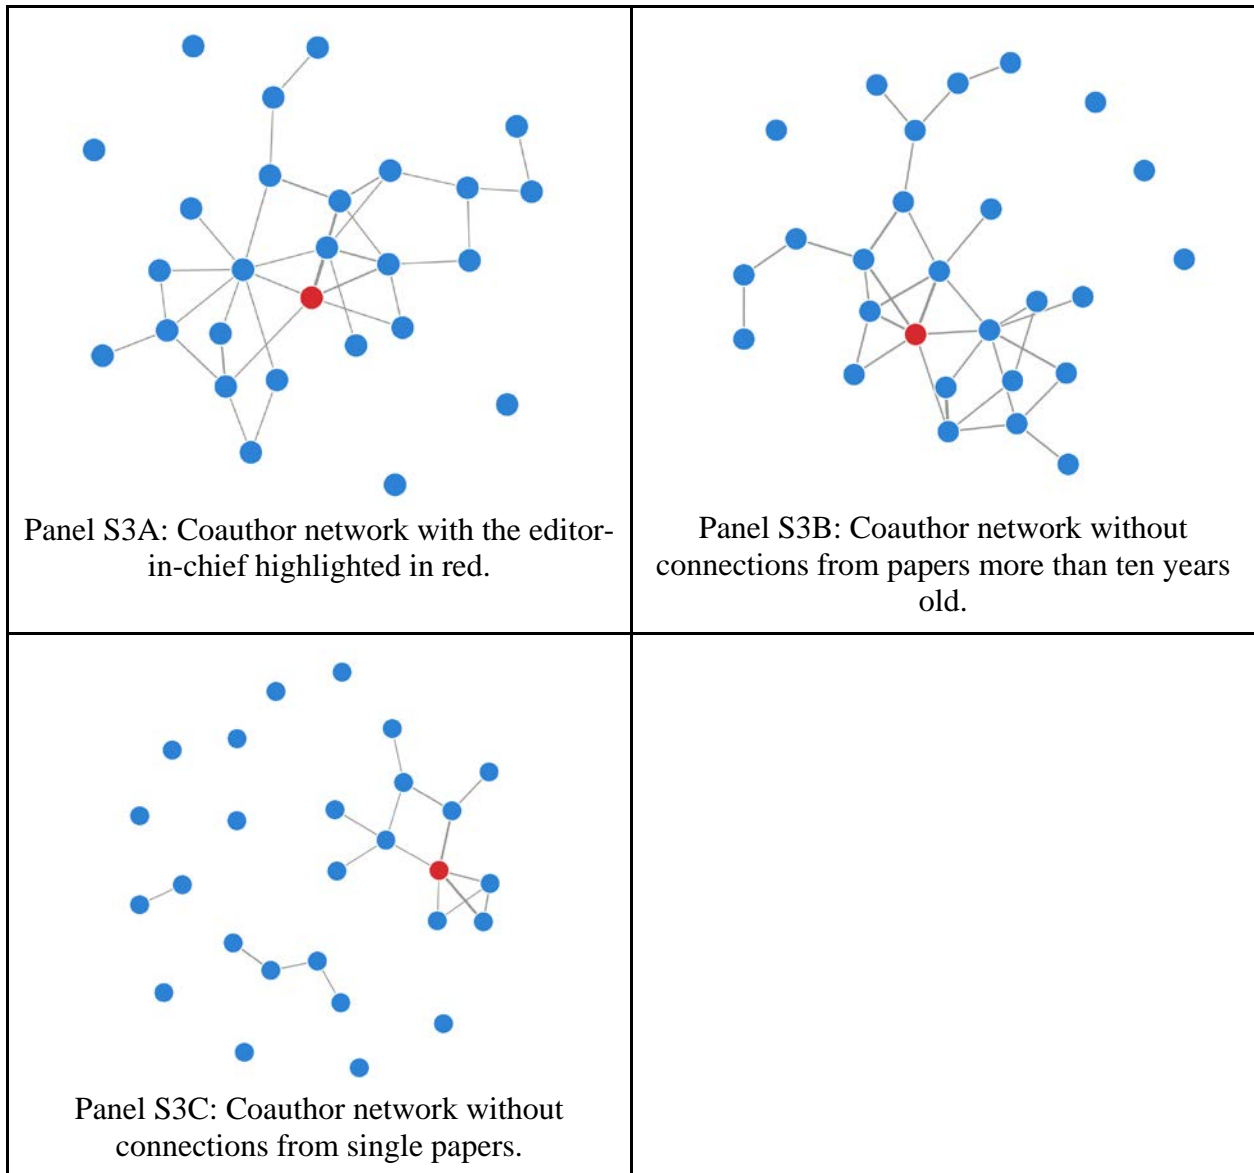

**Figure S3. Network graphics for *Information Systems Research*, showing all coauthor relationships (panel A), coauthor relationships within the last ten years (panel B), and coauthor relationships excluding connections from single papers (panel C).**

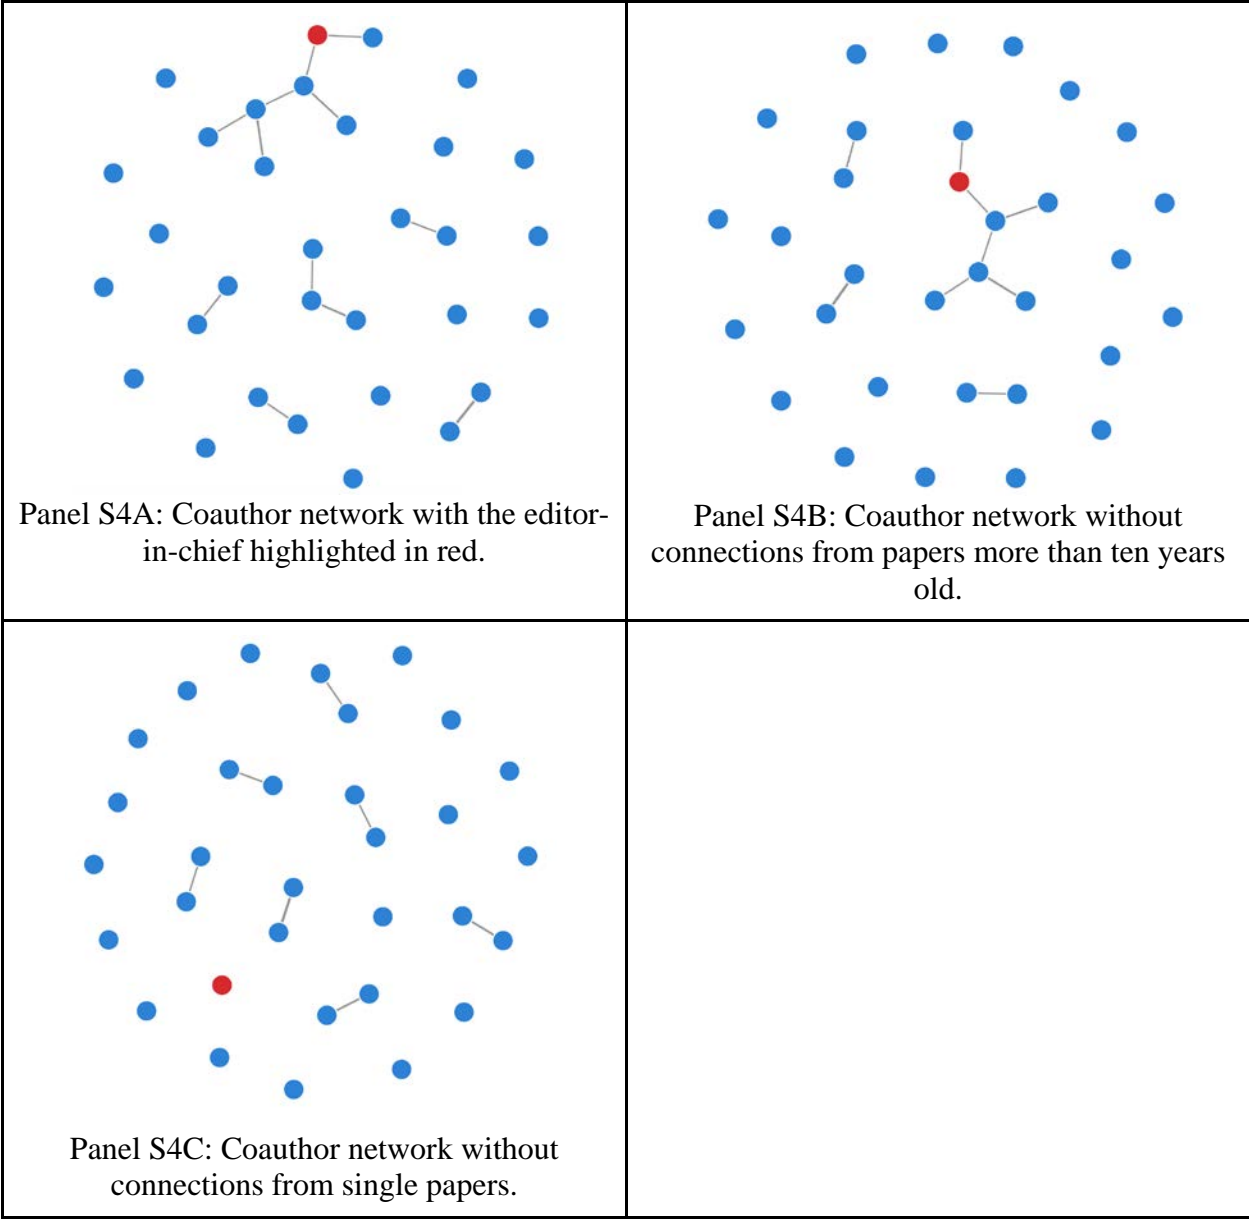

**Figure S4. Network graphics for *INFORMS Journal on Applied Analytics*, showing all coauthor relationships (panel A), coauthor relationships within the last ten years (panel B), and coauthor relationships excluding connections from single papers (panel C).**

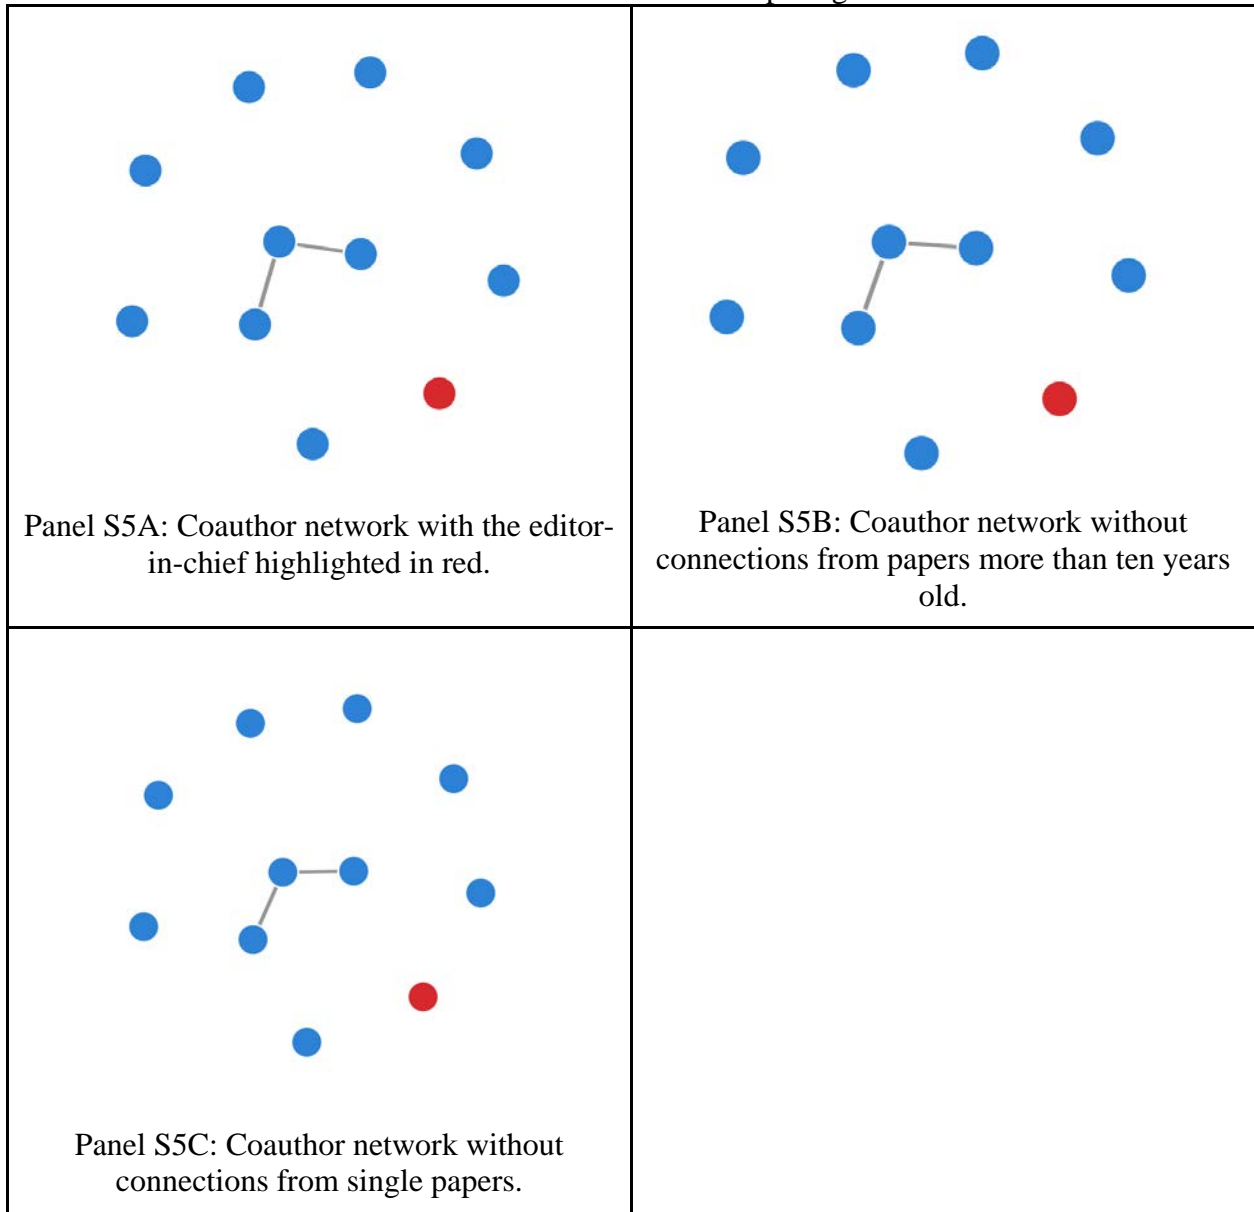

**Figure S5. Network graphics for *INFORMS Journal on Computing*, showing all coauthor relationships (panel A), coauthor relationships within the last ten years (panel B), and coauthor relationships excluding connections from single papers (panel C).**

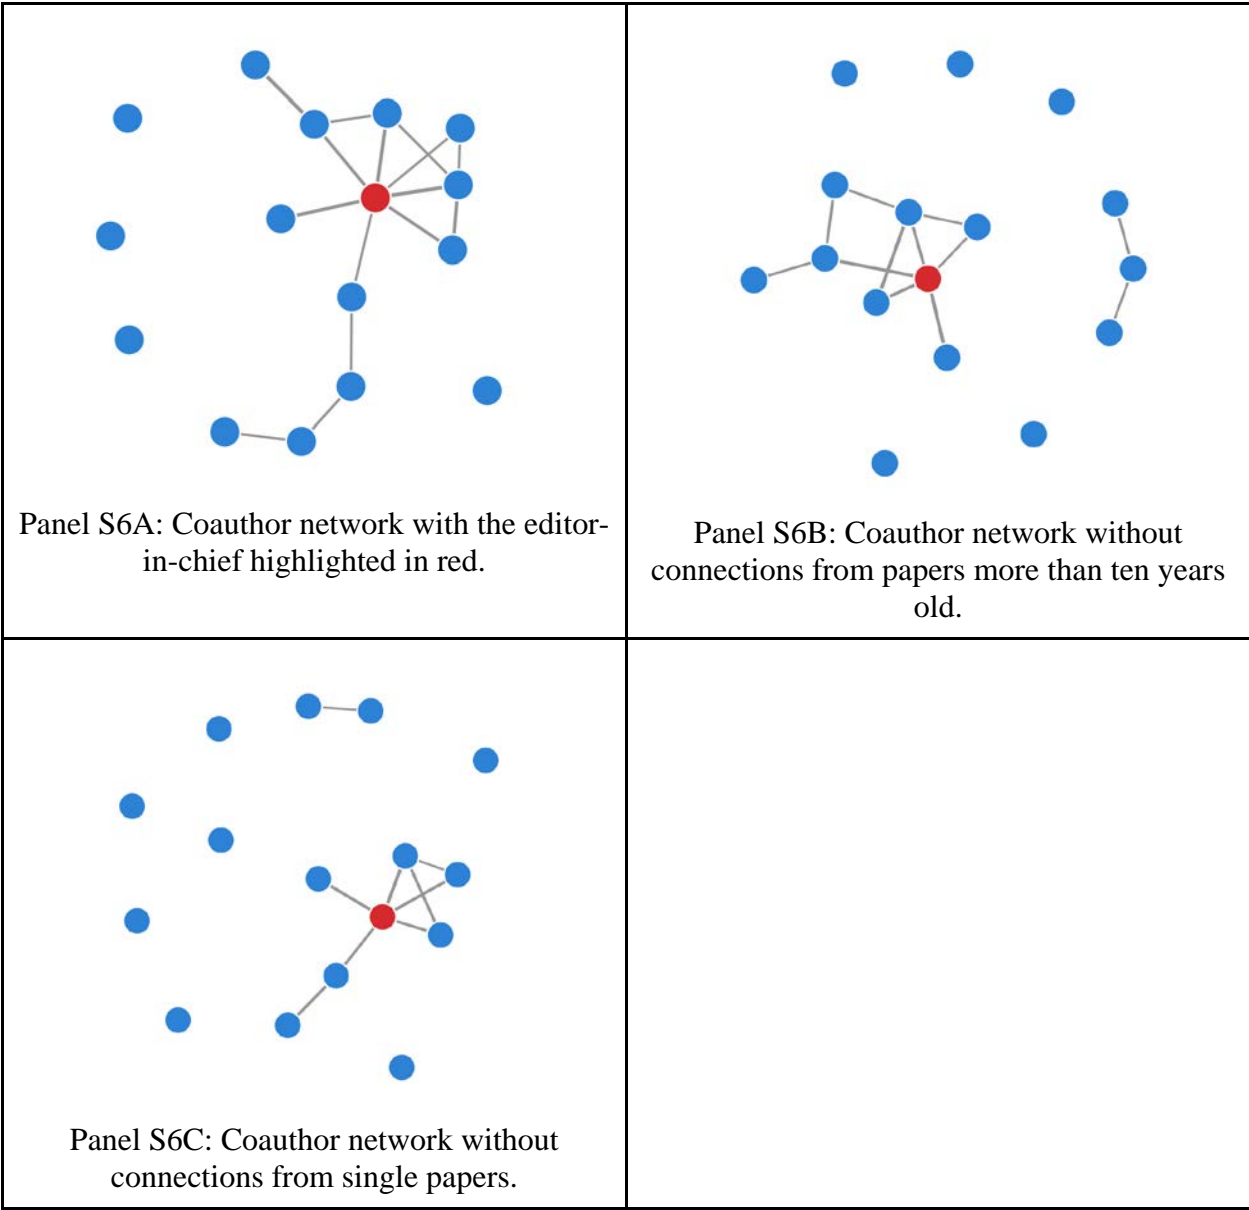

**Figure S6. Network graphics for *INFORMS Journal on Optimization*, showing all coauthor relationships (panel A), coauthor relationships within the last ten years (panel B), and coauthor relationships excluding connections from single papers (panel C).**

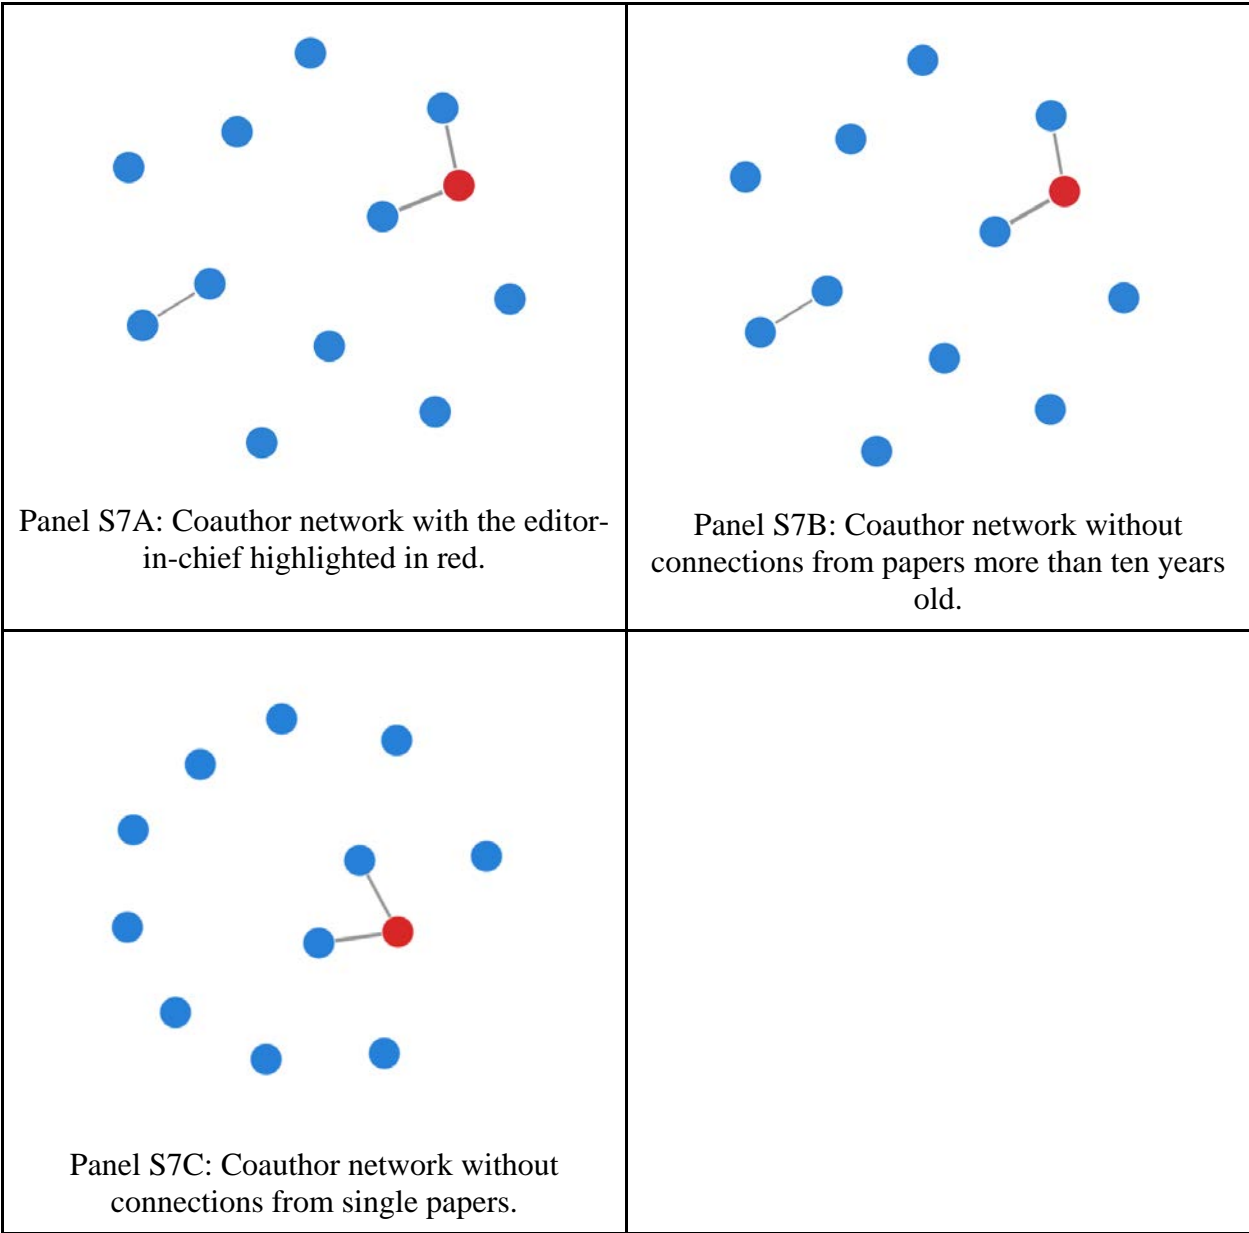

**Figure S7. Network graphics for *INFORMS Transactions on Education*, showing all coauthor relationships (panel A), coauthor relationships within the last ten years (panel B), and coauthor relationships excluding connections from single papers (panel C).**

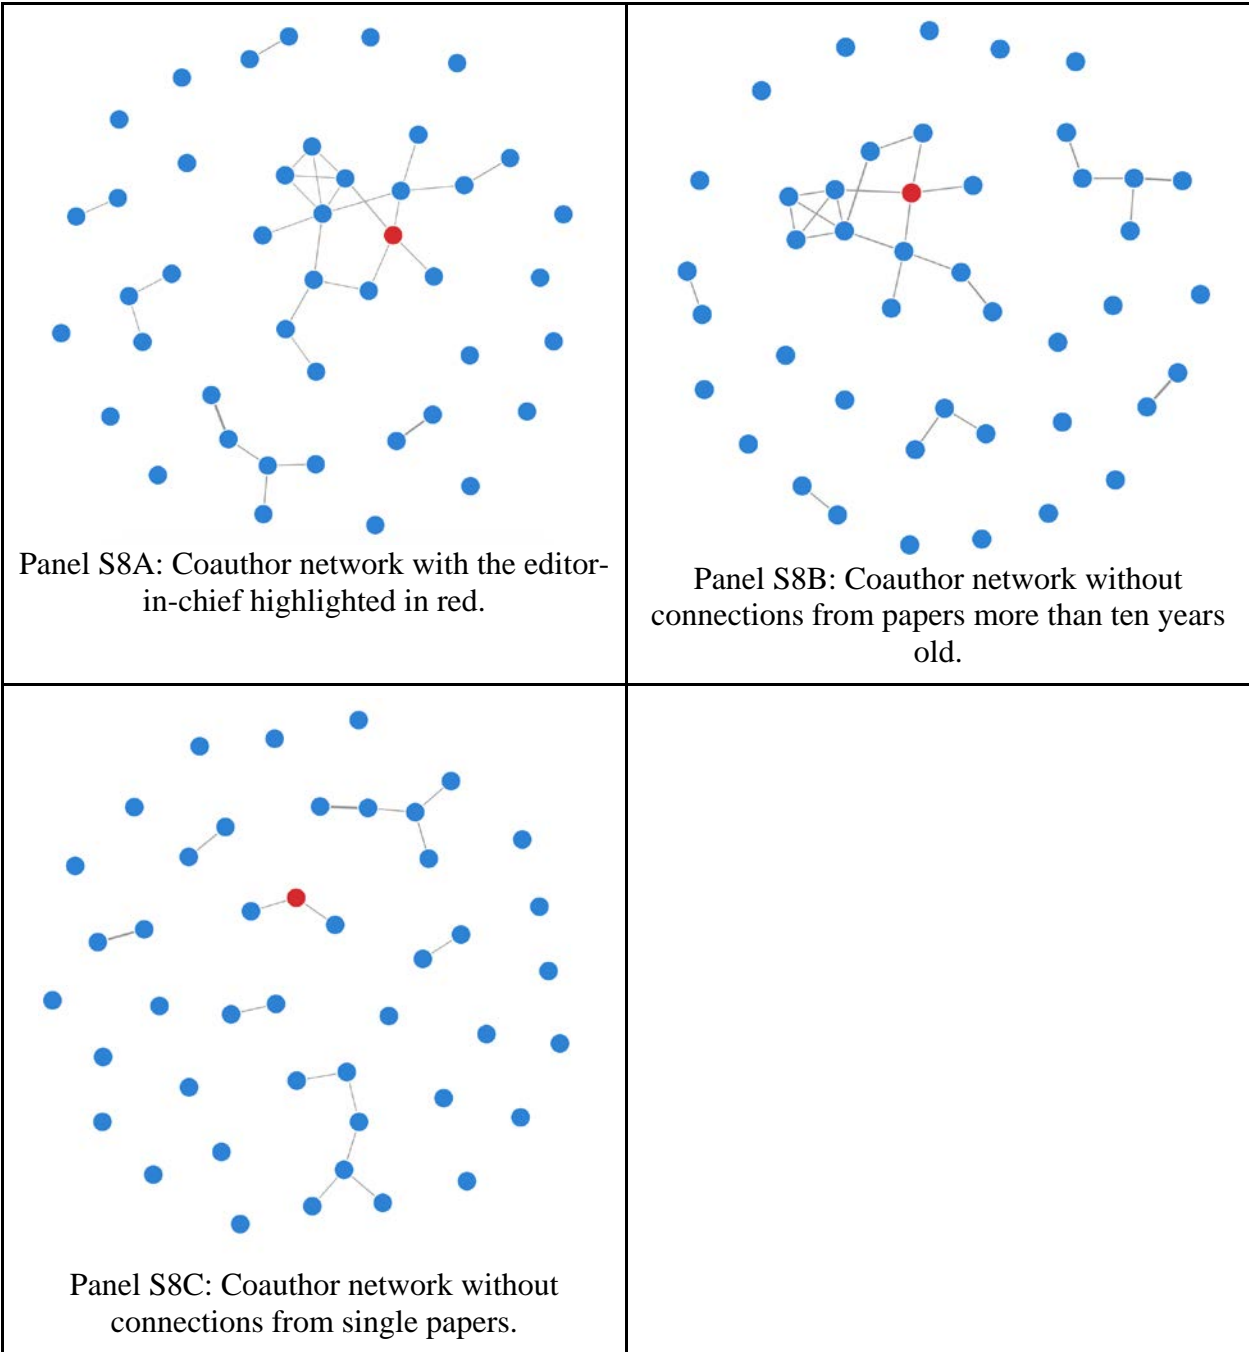

**Figure S8. Network graphics for *Management Science*, showing all coauthor relationships (panel A), coauthor relationships within the last ten years (panel B), and coauthor relationships excluding connections from single papers (panel C).**

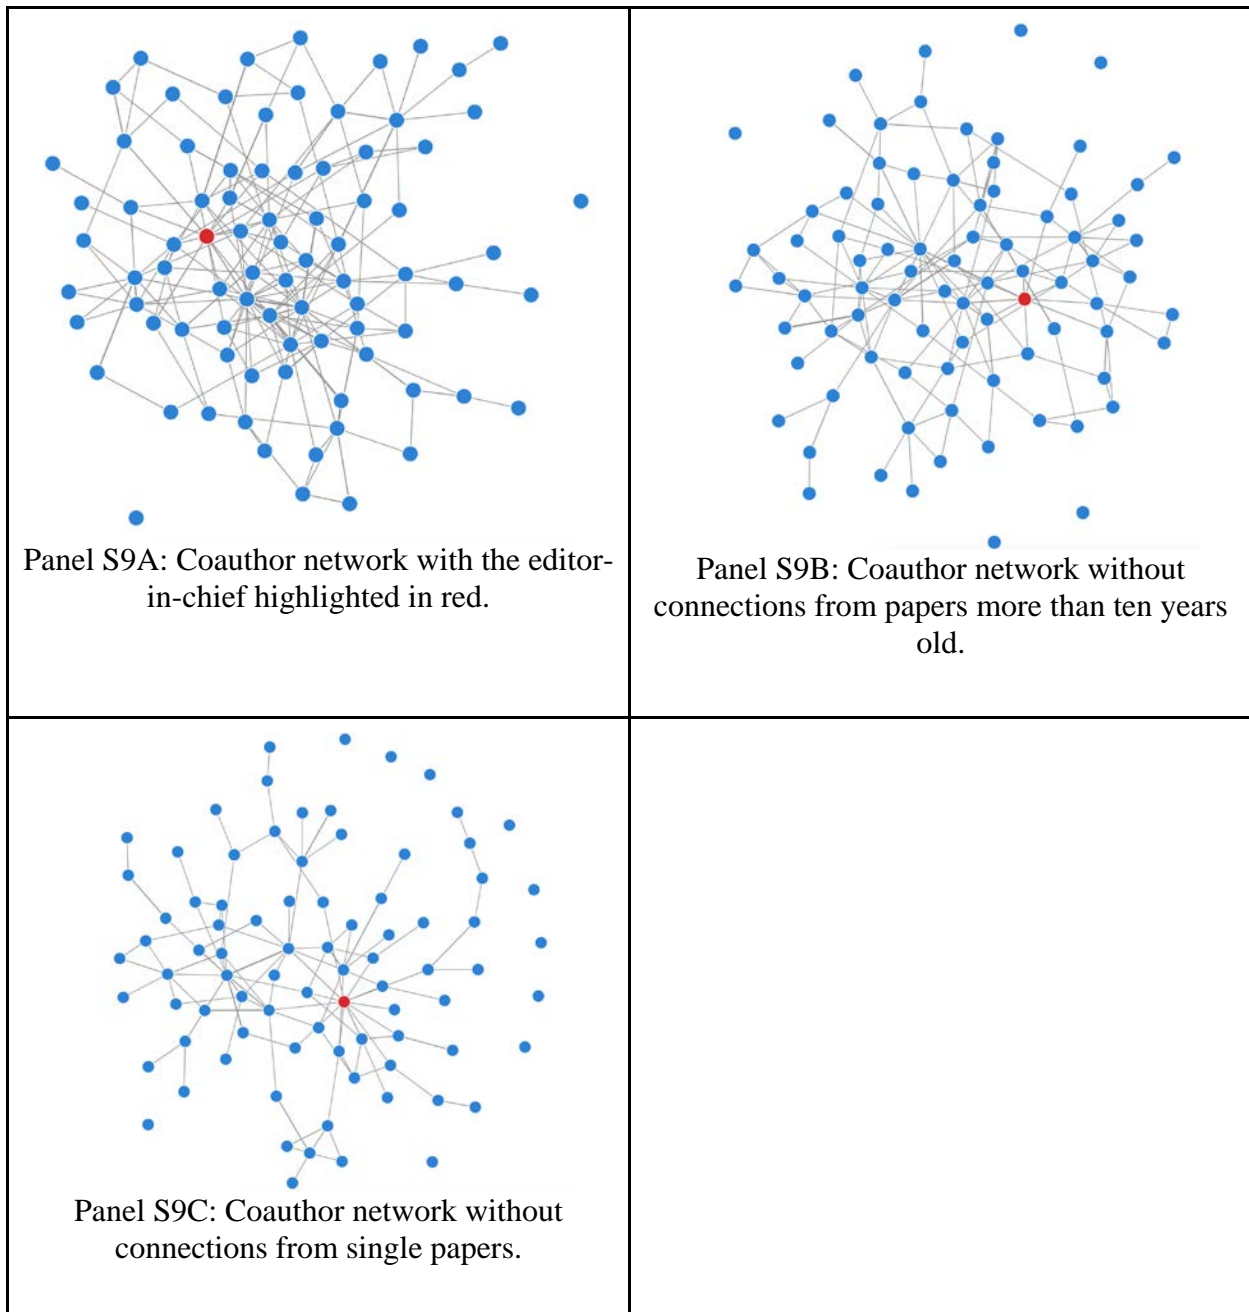

**Figure S9. Network graphics for *Manufacturing and Service Operations Management*, showing all coauthor relationships (panel A), coauthor relationships within the last ten years (panel B), and coauthor relationships excluding connections from single papers (panel C).**

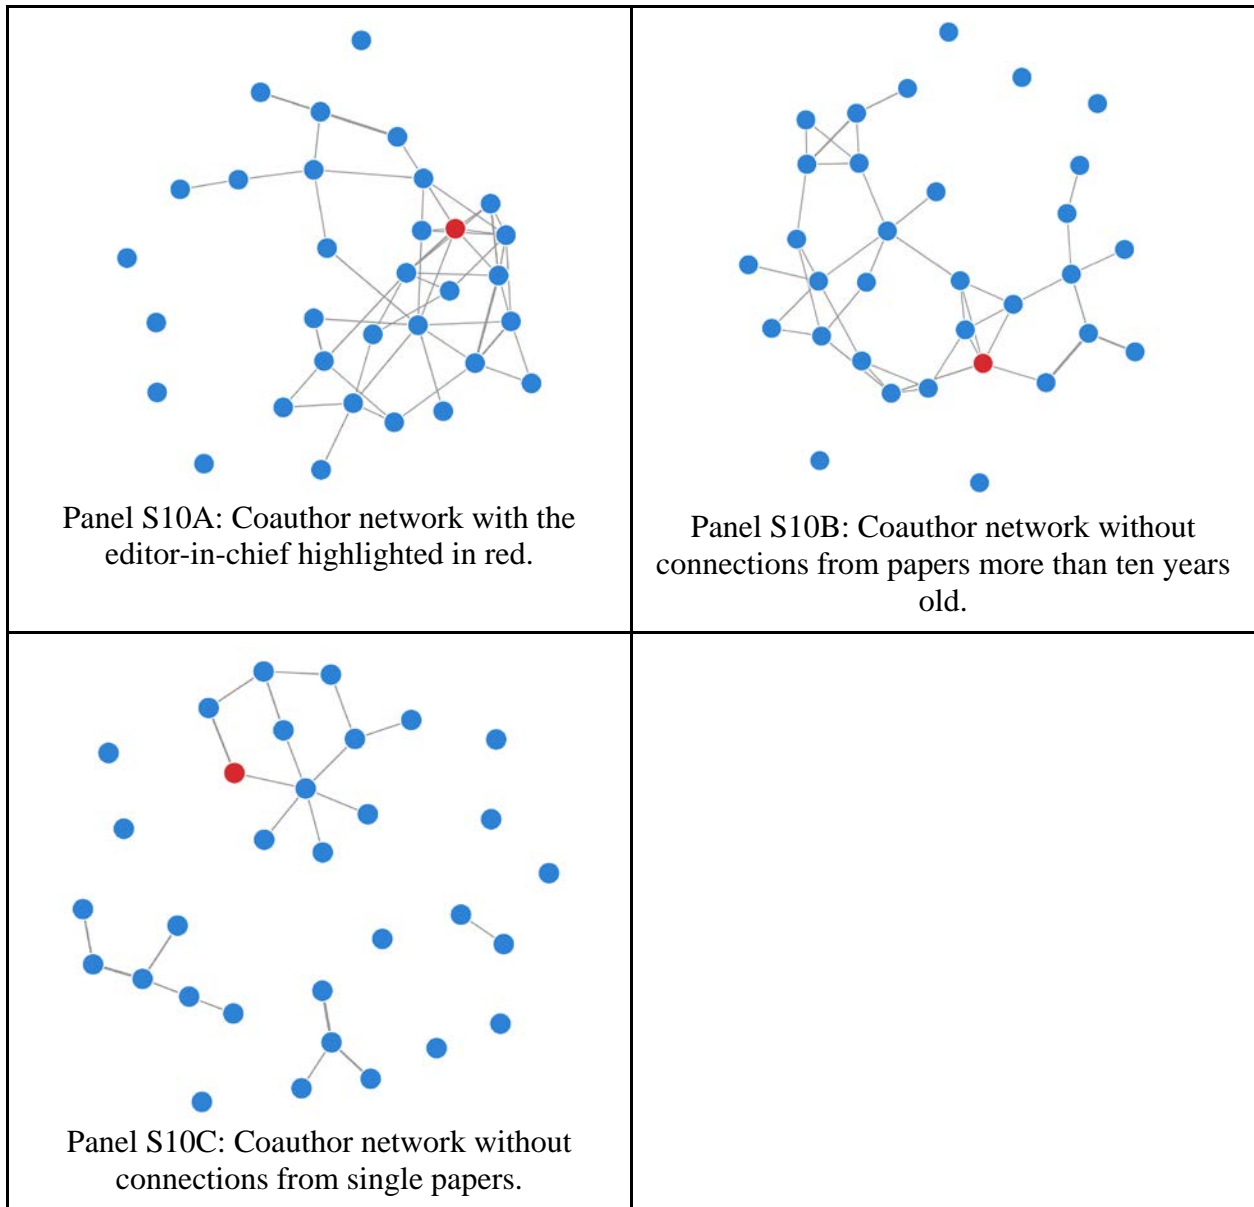

**Figure S10. Network graphics for *Marketing Science*, showing all coauthor relationships (panel A), coauthor relationships within the last ten years (panel B), and coauthor relationships excluding connections from single papers (panel C).**

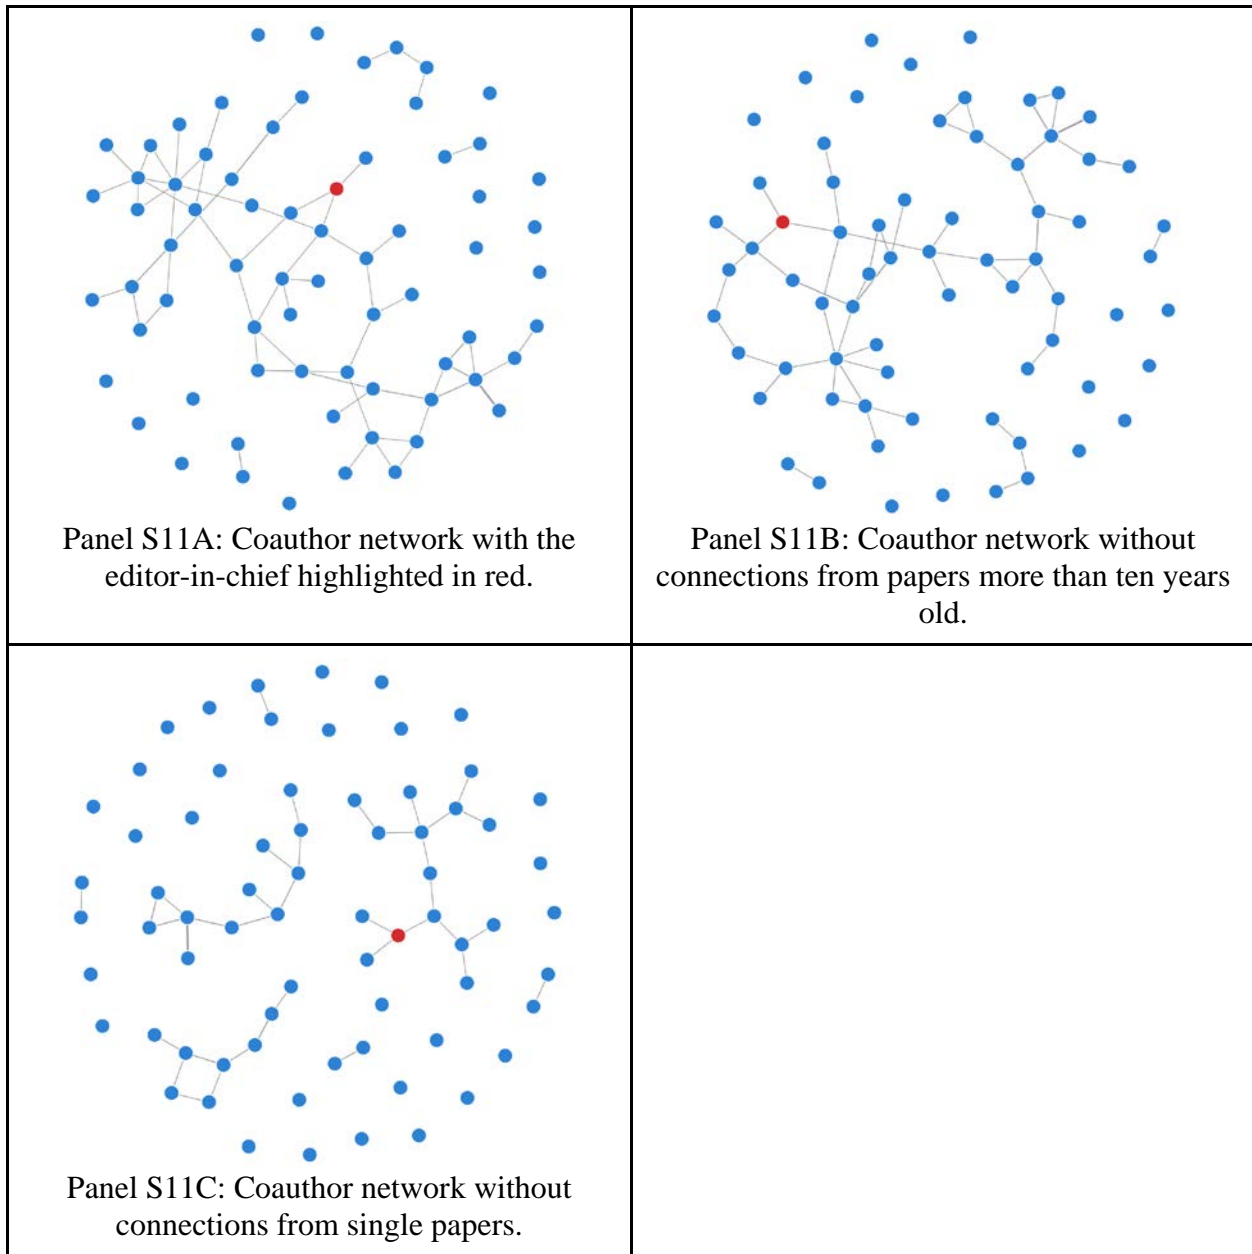

**Figure S11. Network graphics for *Mathematics of Operations Research*, showing all coauthor relationships (panel A), coauthor relationships within the last ten years (panel B), and coauthor relationships excluding connections from single papers (panel C).**

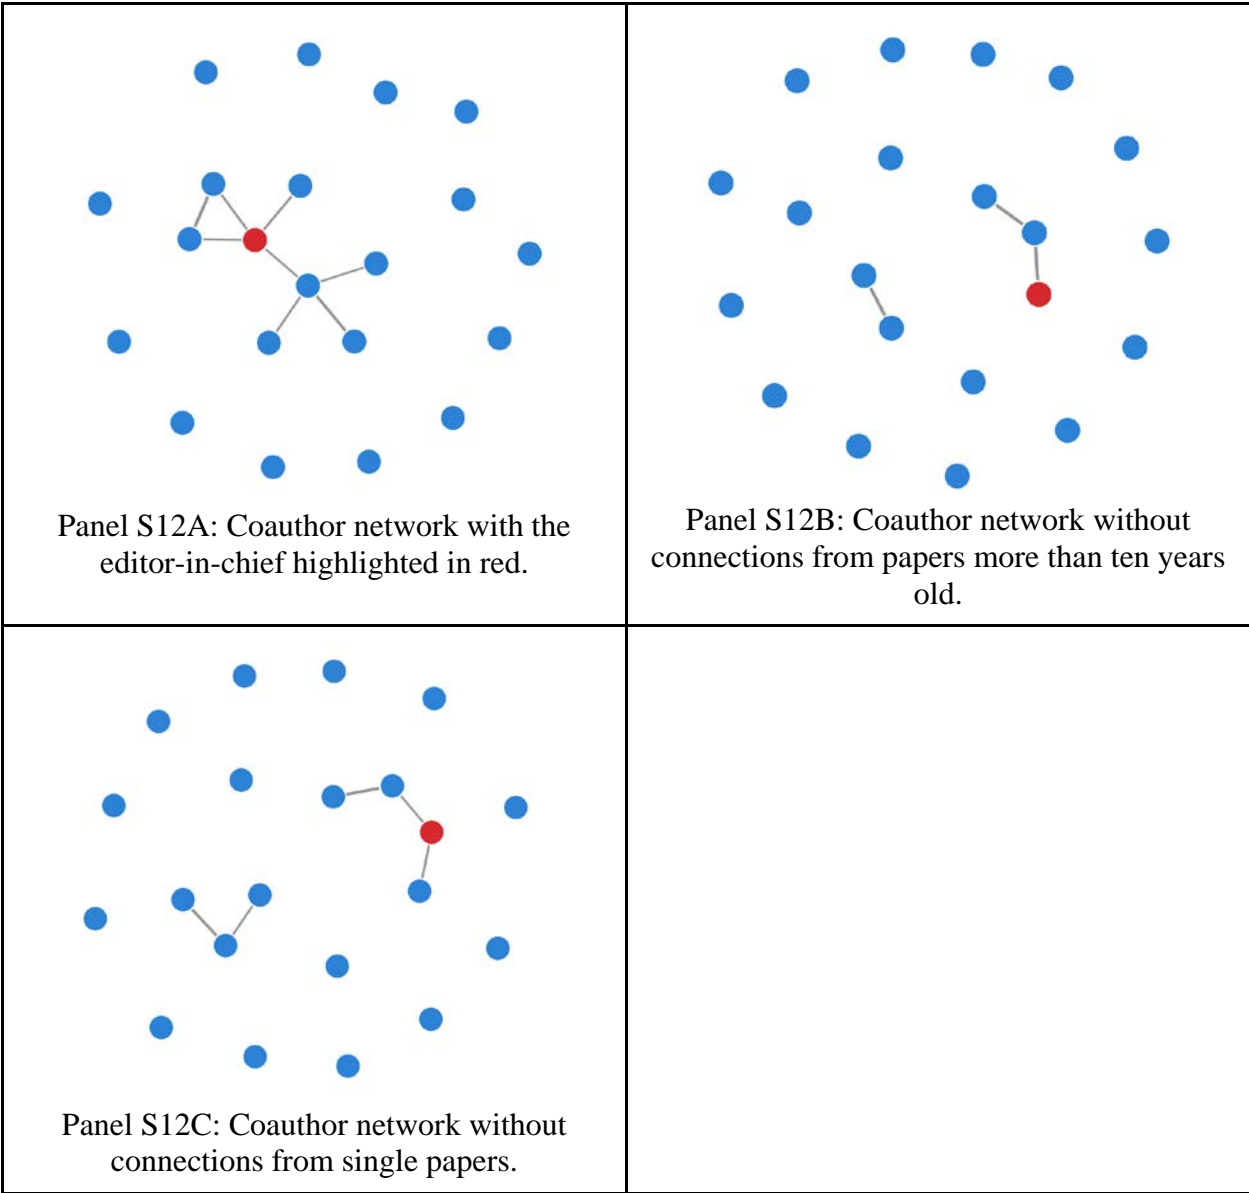

**Figure S12. Network graphics for *Operations Research*, showing all coauthor relationships (panel A), coauthor relationships within the last ten years (panel B), and coauthor relationships excluding connections from single papers (panel C).**

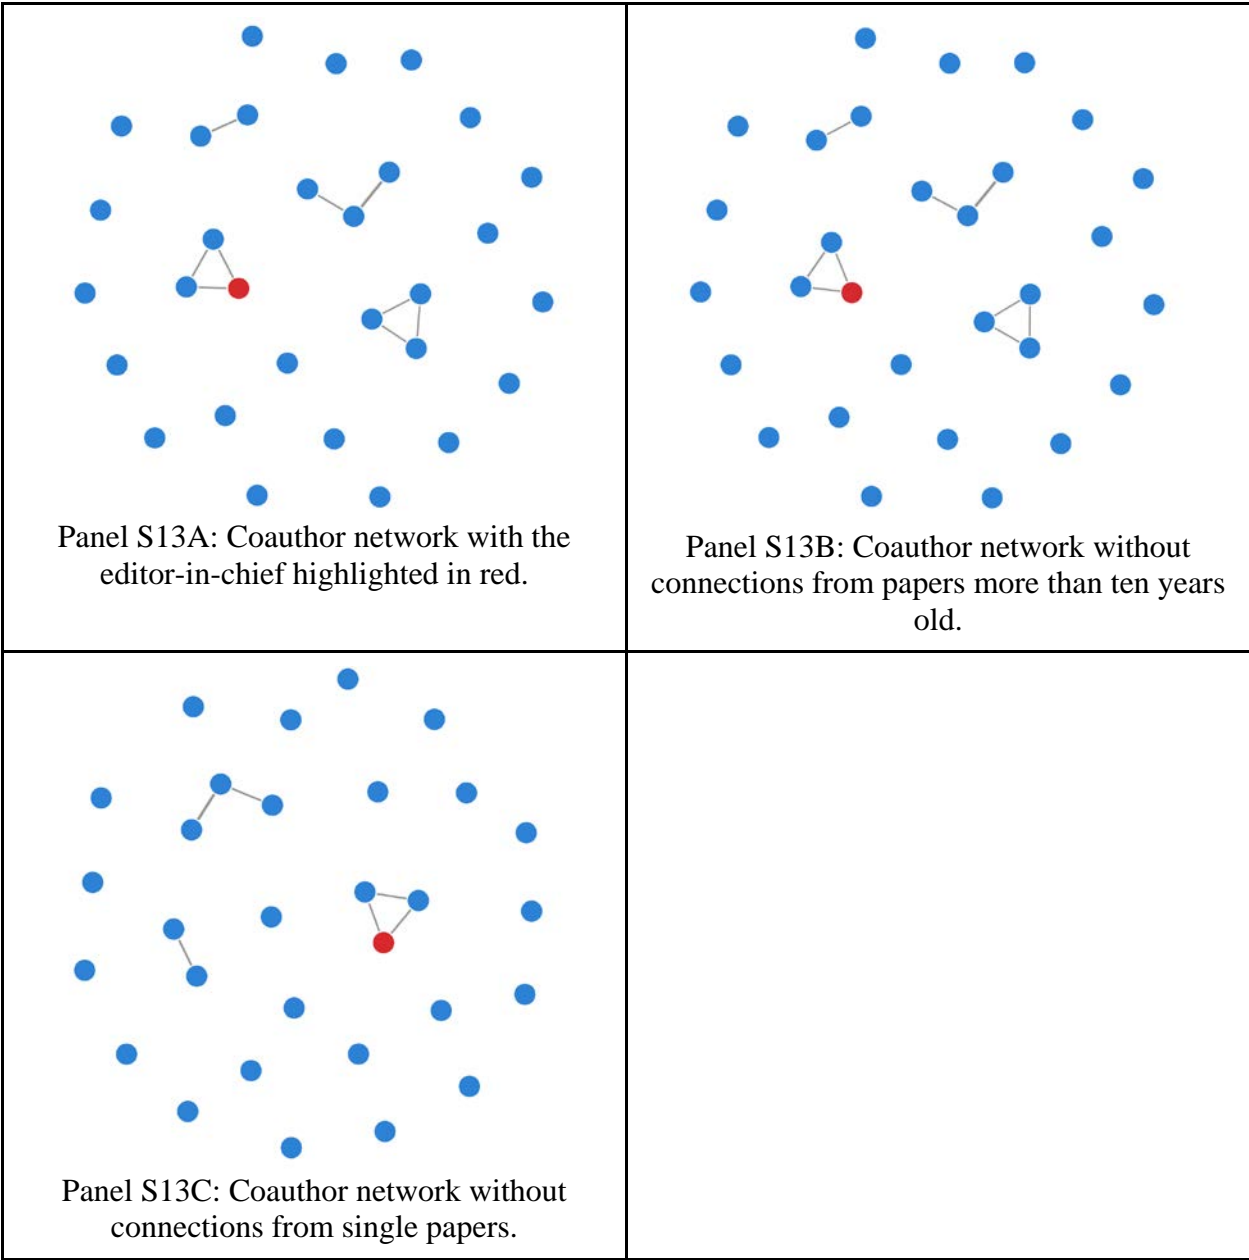

**Figure S13. Network graphics for *Organization Science*, showing all coauthor relationships (panel A), coauthor relationships within the last ten years (panel B), and coauthor relationships excluding connections from single papers (panel C).**

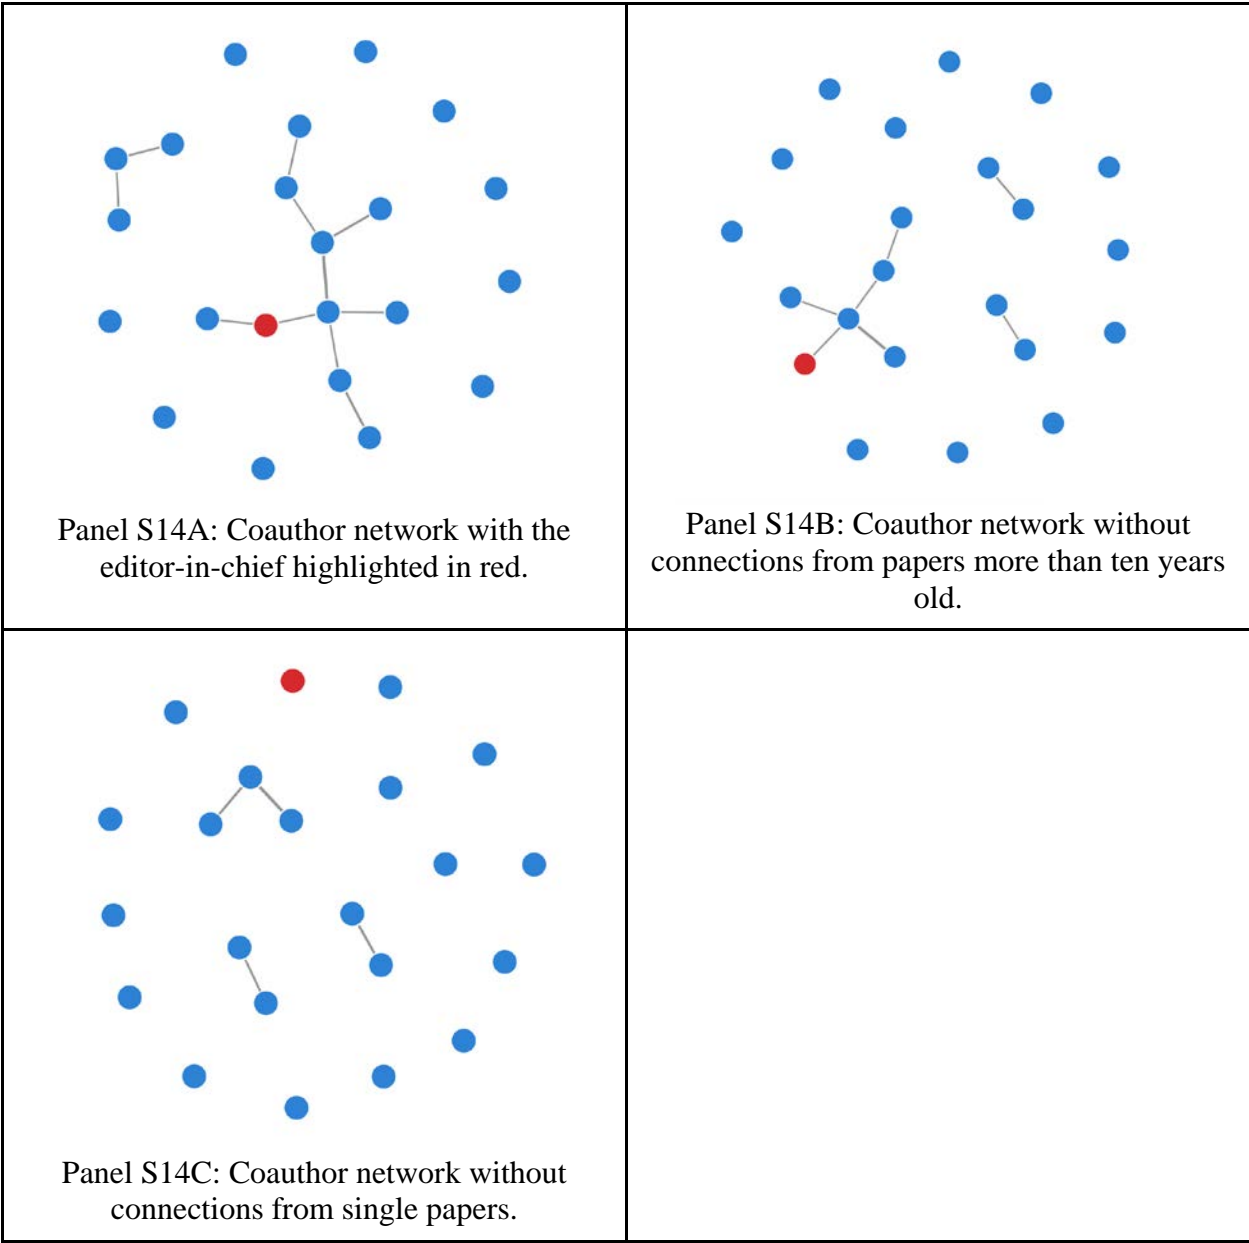

**Figure S14. Network graphics for *Service Science*, showing all coauthor relationships (panel A), coauthor relationships within the last ten years (panel B), and coauthor relationships excluding connections from single papers (panel C).**

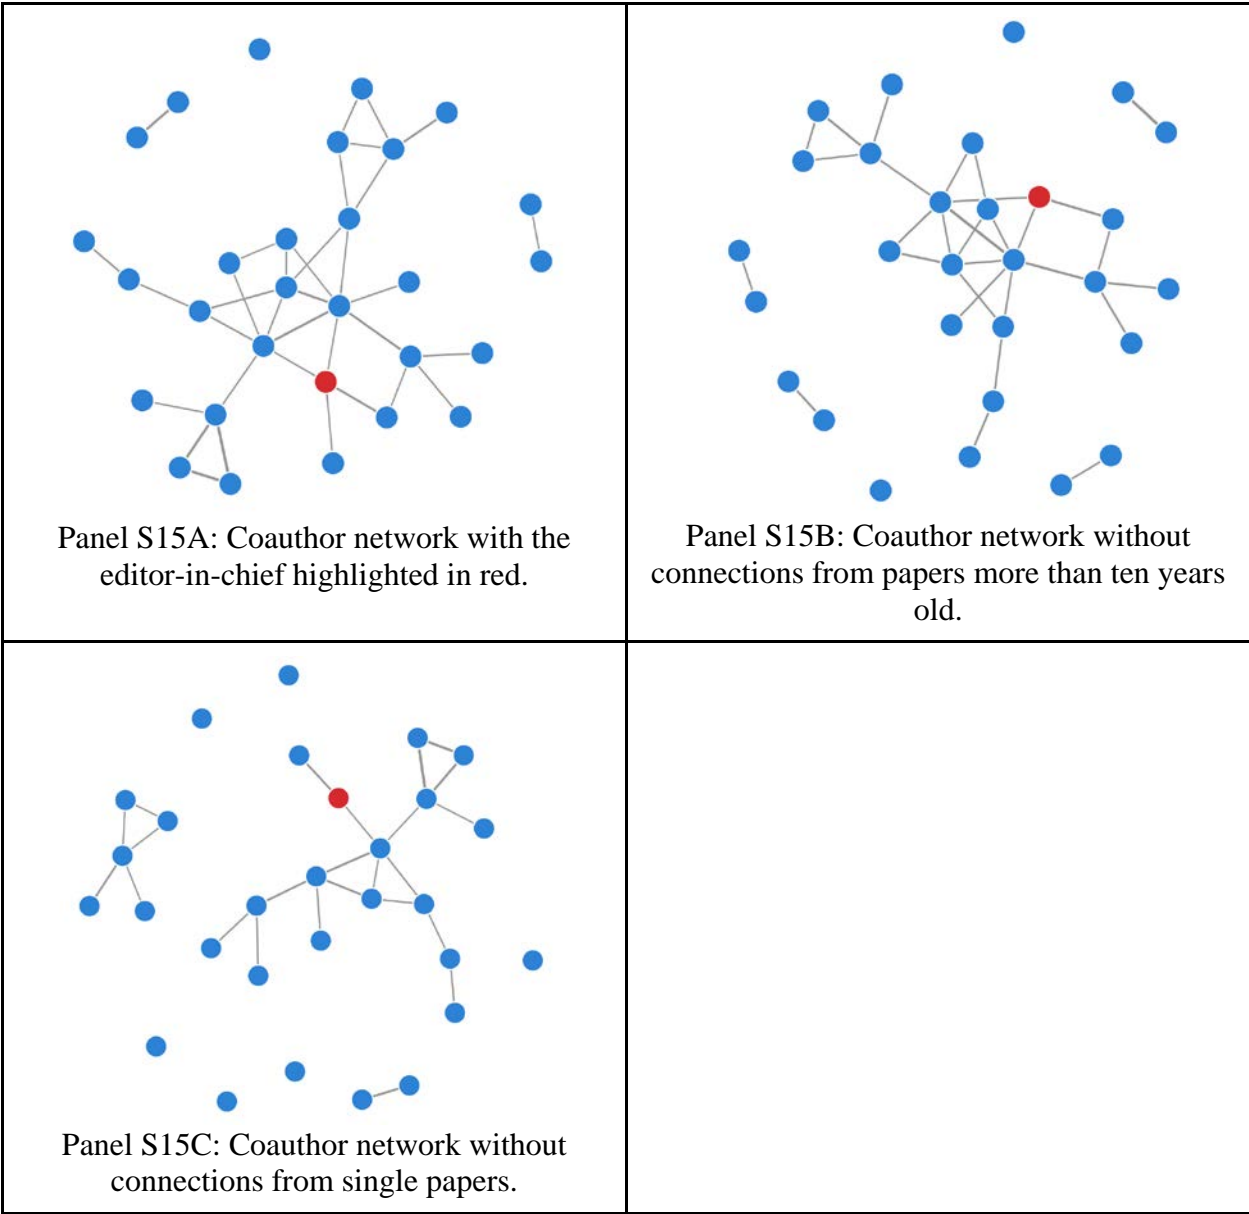

**Figure S15. Network graphics for *Stochastic Systems*, showing all coauthor relationships (panel A), coauthor relationships within the last ten years (panel B), and coauthor relationships excluding connections from single papers (panel C).**

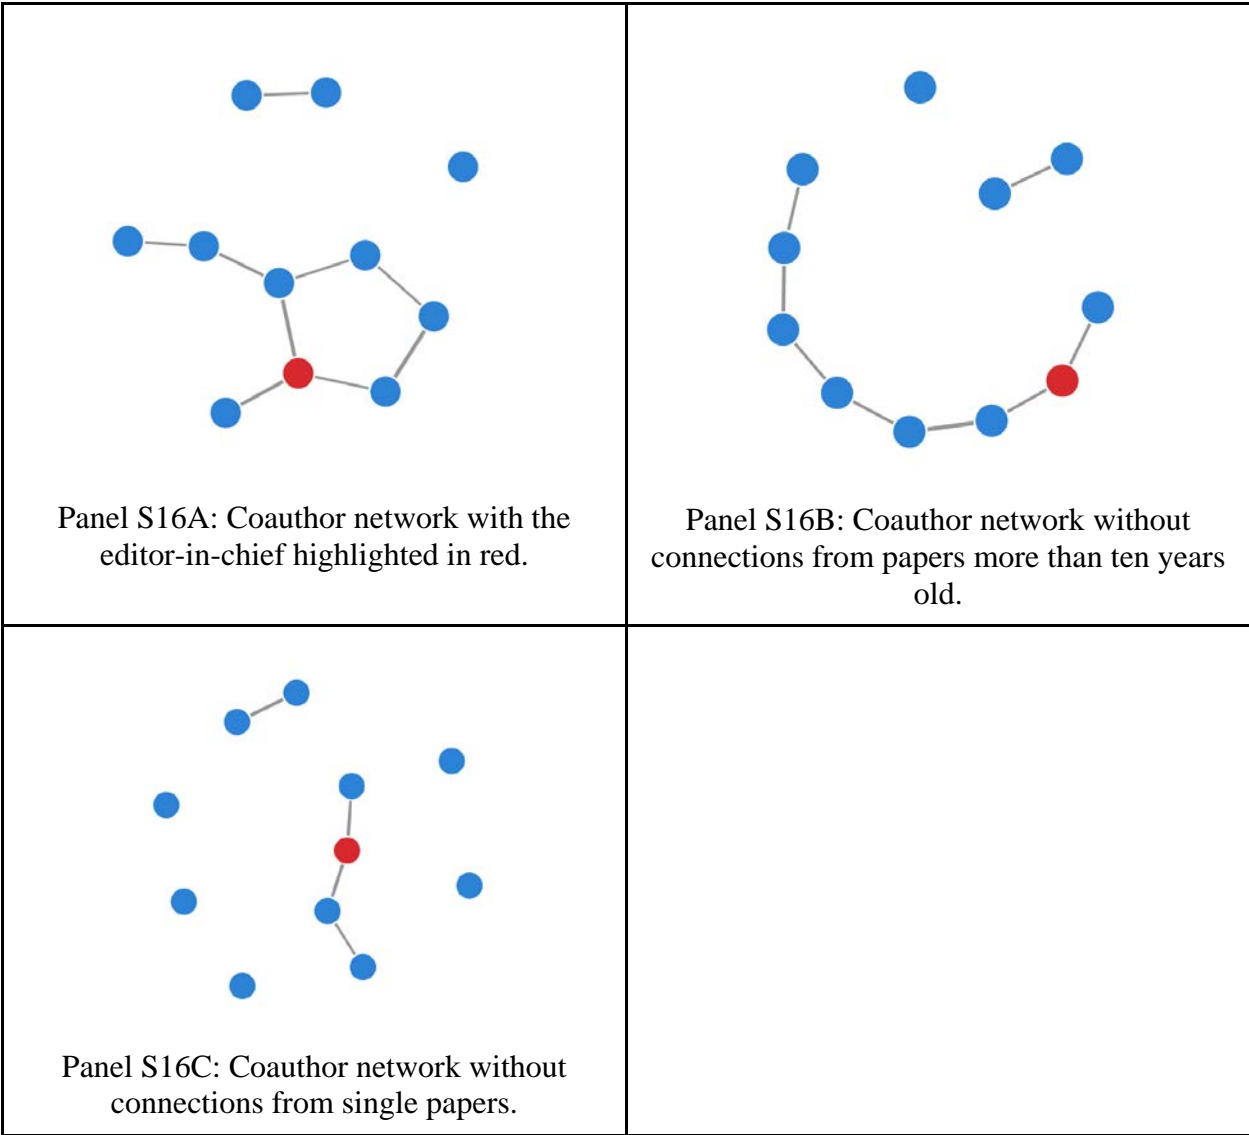

**Figure S16. Network graphics for *Strategy Science*, showing all coauthor relationships (panel A), coauthor relationships within the last ten years (panel B), and coauthor relationships excluding connections from single papers (panel C).**

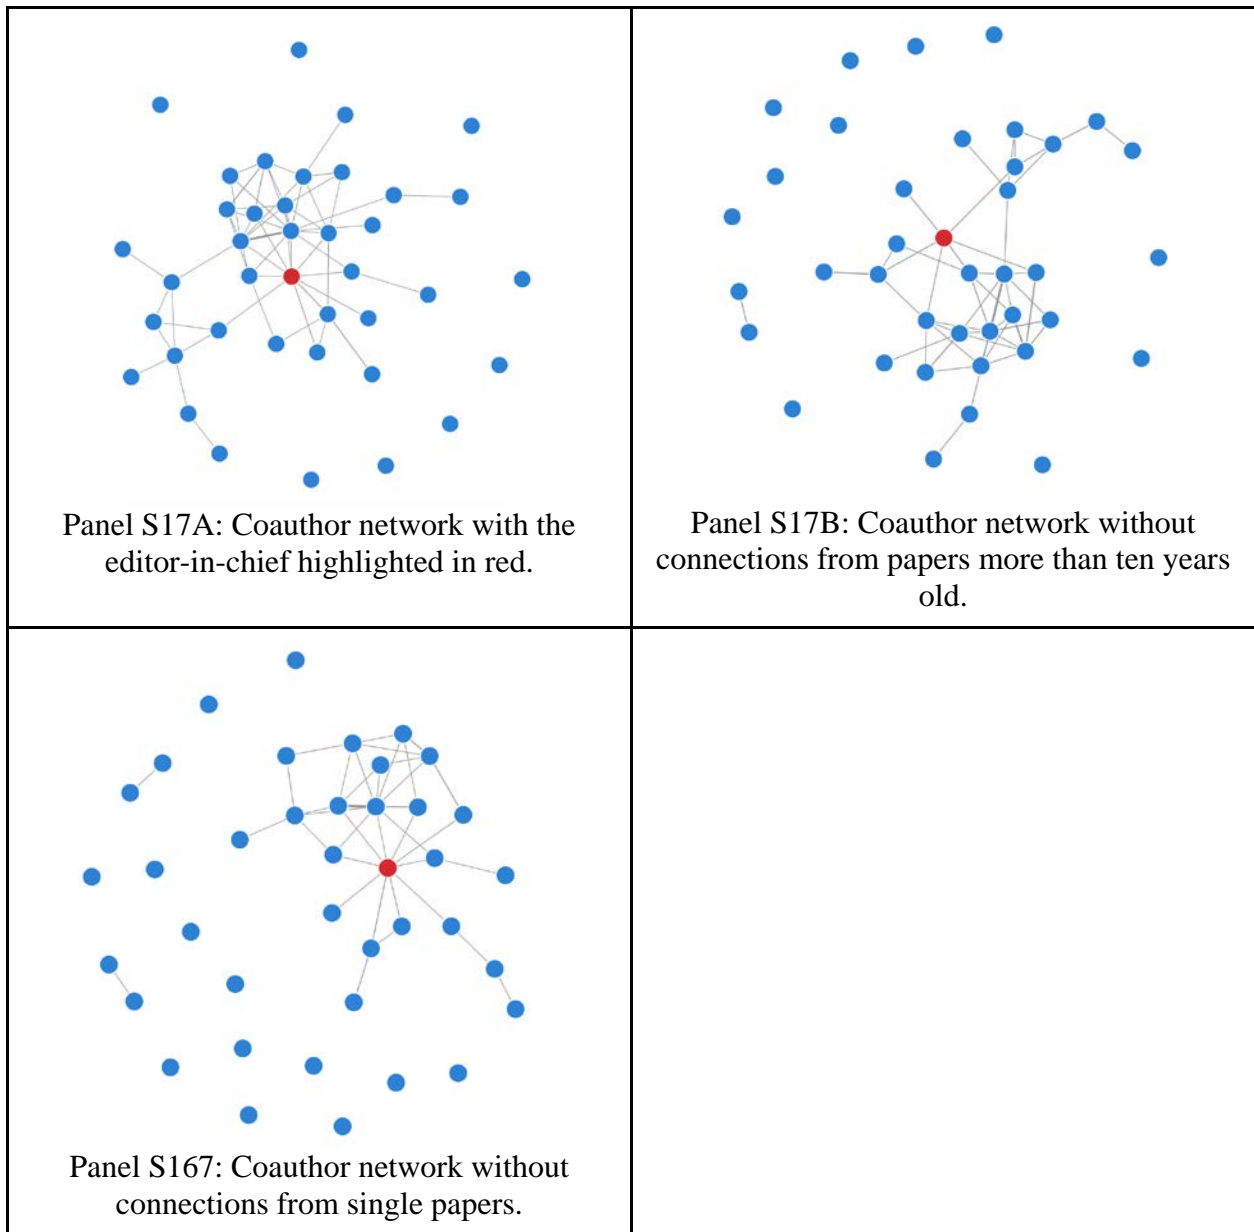

**Figure S17. Network graphics for *Transportation Science*, showing all coauthor relationships (panel A), coauthor relationships within the last ten years (panel B), and coauthor relationships excluding connections from single papers (panel C).**
